# Supplementary material for: Organic carbon in surface sediments of the North Sea and Skagerrak
Source: Copernicus journal article supplement (doi:10.5194/bg-2020-352), 2020-10-06
Supplement: Supplementary file 1 [file SupplementaryDataTable1.xlsx]

## Sheet: sedrate
FID	StnNo	Latitude	Longitude	SedRate	Unit	Method	Remarks	Source	POINT_X	POINT_Y
54		58.072	10	0.38	cm/yr	210Pb		Anton et al. (1993) Mar. Geol., 111: 287-297.	4.32092e+06	3.88554e+06
63		57.97	9.35217	0.54	cm/yr	210Pb		Anton et al. (1993) Mar. Geol., 111: 287-297.	4.28252e+06	3.87437e+06
16	4	58.918	10.481	0.09	cm/yr	210Pb		Bøe et al. (1996) NGU Bulletin. 430: 75-84.	4.34869e+06	3.97971e+06
17	11	58.807	9.96	0.05	cm/yr	210Pb		Bøe et al. (1996) NGU Bulletin. 430: 75-84.	4.3186e+06	3.96728e+06
20	21	58.675	9.729	0.25	cm/yr	210Pb		Bøe et al. (1996) NGU Bulletin. 430: 75-84.	4.30517e+06	3.95263e+06
22	14	58.625	10.352	0.97	cm/yr	210Pb		Bøe et al. (1996) NGU Bulletin. 430: 75-84.	4.34141e+06	3.94709e+06
23	28	58.61	9.61	0.26	cm/yr	210Pb		Bøe et al. (1996) NGU Bulletin. 430: 75-84.	4.29821e+06	3.94543e+06
27	32	58.481	9.627	0.24	cm/yr	210Pb		Bøe et al. (1996) NGU Bulletin. 430: 75-84.	4.29912e+06	3.93108e+06
39	52	58.165	9.518	0.3	cm/yr	210Pb		Bøe et al. (1996) NGU Bulletin. 430: 75-84.	4.2925e+06	3.89598e+06
40	56	58.155	9.29	0.23	cm/yr	210Pb		Bøe et al. (1996) NGU Bulletin. 430: 75-84.	4.27905e+06	3.89498e+06
41	57	58.209	9.178	0.18	cm/yr	210Pb		Bøe et al. (1996) NGU Bulletin. 430: 75-84.	4.27252e+06	3.90106e+06
45	63	58.094	9.181	0.18	cm/yr	210Pb		Bøe et al. (1996) NGU Bulletin. 430: 75-84.	4.27254e+06	3.88827e+06
46	69	58.086	8.95	0.11	cm/yr	210Pb		Bøe et al. (1996) NGU Bulletin. 430: 75-84.	4.25888e+06	3.88756e+06
47	70	58.143	8.832	0.22	cm/yr	210Pb		Bøe et al. (1996) NGU Bulletin. 430: 75-84.	4.25202e+06	3.894e+06
55	74	58.022	8.835	0.15	cm/yr	210Pb		Bøe et al. (1996) NGU Bulletin. 430: 75-84.	4.25197e+06	3.88055e+06
64	67	57.97	9.188	0.47	cm/yr	210Pb		Bøe et al. (1996) NGU Bulletin. 430: 75-84.	4.27279e+06	3.87447e+06
78	78	57.794	9.057	0.21	cm/yr	210Pb		Bøe et al. (1996) NGU Bulletin. 430: 75-84.	4.26476e+06	3.855e+06
81	89	57.727	8.945	0.08	cm/yr	210Pb		Bøe et al. (1996) NGU Bulletin. 430: 75-84.	4.25797e+06	3.84764e+06
82	100	57.751	8.408	0.12	cm/yr	210Pb		Bøe et al. (1996) NGU Bulletin. 430: 75-84.	4.226e+06	3.8509e+06
86	103	57.643	8.394	0.21	cm/yr	210Pb		Bøe et al. (1996) NGU Bulletin. 430: 75-84.	4.22489e+06	3.83891e+06
35		58.2667	9.51833	0.4	cm/yr	210Pb		Bojesen-Koefoed (1992) Thesis Dan. Tekn. Højskole	4.2926e+06	3.90729e+06
42		58.1767	9.545	0.3	cm/yr	210Pb		Bojesen-Koefoed (1992) Thesis Dan. Tekn. Højskole	4.2941e+06	3.89727e+06
56		58.05	9.59667	0.3	cm/yr	210Pb		Bojesen-Koefoed (1992) Thesis Dan. Tekn. Højskole	4.29706e+06	3.88316e+06
65		57.9417	10.4283	0.4	cm/yr	210Pb		Bojesen-Koefoed (1992) Thesis Dan. Tekn. Højskole	4.34633e+06	3.87113e+06
4		60.333	3.3663	0.14	cm/yr	210Pb		de Haas and van Weering (1997) Mar. Geol., 136: 173-187.	3.95407e+06	4.15408e+06
29		58.3313	5.0165	0.04	cm/yr	210Pb		de Haas and van Weering (1997) Mar. Geol., 136: 173-187.	4.02874e+06	3.92459e+06
57		58.0273	6.5245	0.08	cm/yr	210Pb		de Haas and van Weering (1997) Mar. Geol., 136: 173-187.	4.11534e+06	3.88558e+06
66		57.9573	6.504	0.15	cm/yr	210Pb		de Haas and van Weering (1997) Mar. Geol., 136: 173-187.	4.11373e+06	3.87786e+06
71		57.8915	7.0733	0.34	cm/yr	210Pb		de Haas and van Weering (1997) Mar. Geol., 136: 173-187.	4.14713e+06	3.86903e+06
87		57.6577	6.641	0.18	cm/yr	210Pb		de Haas and van Weering (1997) Mar. Geol., 136: 173-187.	4.12021e+06	3.84418e+06
91		57.5783	6.9983	0.09	cm/yr	210Pb		de Haas and van Weering (1997) Mar. Geol., 136: 173-187.	4.14116e+06	3.83441e+06
93		57.565	9.59667	0	cm/yr	210Pb	no net sedimentation	de Haas and van Weering (1997) Mar. Geol., 136: 173-187.	4.29675e+06	3.82922e+06
94		57.519	6.9823	0.27	cm/yr	210Pb		de Haas and van Weering (1997) Mar. Geol., 136: 173-187.	4.13991e+06	3.82786e+06
98		57.3265	8.577	0	cm/yr	210Pb	no net sedimentation	de Haas and van Weering (1997) Mar. Geol., 136: 173-187.	4.2351e+06	3.80348e+06
0		60.725	4.495	0.03	cm/yr	210Pb		de Haas et al. (1996) NGU Bulletin. 430: 57-65.	4.01991e+06	4.19216e+06
1		60.7118	4.1713	0.28	cm/yr	210Pb		de Haas et al. (1996) NGU Bulletin. 430: 57-65.	4.00212e+06	4.19211e+06
2		60.7248	3.3482	0.06	cm/yr	210Pb		de Haas et al. (1996) NGU Bulletin. 430: 57-65.	3.9574e+06	4.19752e+06
5		60.3433	4.6553	0.06	cm/yr	210Pb		de Haas et al. (1996) NGU Bulletin. 430: 57-65.	4.02526e+06	4.14919e+06
6		59.9908	3.2967	0.14	cm/yr	210Pb		de Haas et al. (1996) NGU Bulletin. 430: 57-65.	3.94644e+06	4.11658e+06
7		60.0287	3.919	0.16	cm/yr	210Pb		de Haas et al. (1996) NGU Bulletin. 430: 57-65.	3.98148e+06	4.11764e+06
9		59.51	4.775	0.12	cm/yr	210Pb		de Haas et al. (1996) NGU Bulletin. 430: 57-65.	4.02468e+06	4.05633e+06
10		59.4998	4.455	0.09	cm/yr	210Pb		de Haas et al. (1996) NGU Bulletin. 430: 57-65.	4.00649e+06	4.05657e+06
11		59.5005	4.0882	0.04	cm/yr	210Pb		de Haas et al. (1996) NGU Bulletin. 430: 57-65.	3.98575e+06	4.05833e+06
12		59.2578	4.1475	0.04	cm/yr	210Pb		de Haas et al. (1996) NGU Bulletin. 430: 57-65.	3.98677e+06	4.03115e+06
13		59.2302	4.449	0.06	cm/yr	210Pb		de Haas et al. (1996) NGU Bulletin. 430: 57-65.	4.00369e+06	4.02671e+06
14		59.2178	3.5077	0.09	cm/yr	210Pb		de Haas et al. (1996) NGU Bulletin. 430: 57-65.	3.94993e+06	4.0299e+06
15		59.1987	4.8565	0.04	cm/yr	210Pb		de Haas et al. (1996) NGU Bulletin. 430: 57-65.	4.02667e+06	4.02147e+06
21		58.6113	5.4118	0.12	cm/yr	210Pb		de Haas et al. (1996) NGU Bulletin. 430: 57-65.	4.05397e+06	3.95411e+06
28		58.403	5.1305	0.11	cm/yr	210Pb		de Haas et al. (1996) NGU Bulletin. 430: 57-65.	4.03598e+06	3.93209e+06
30		58.2622	4.8687	0.1	cm/yr	210Pb		de Haas et al. (1996) NGU Bulletin. 430: 57-65.	4.01952e+06	3.91754e+06
3	95-12	60.4995	0	0	cm/yr	210Pb	no net sedimentation	de Haas et al. (1997) Mar. Geol. 144: 131-146.	3.77188e+06	4.19425e+06
8	95-10	59.6663	1.00117	0.09	cm/yr	210Pb		de Haas et al. (1997) Mar. Geol. 144: 131-146.	3.8141e+06	4.09498e+06
95	94II-3	57.565	9.59667	0	cm/yr	210Pb	no net sedimentation	de Haas et al. (1997) Mar. Geol. 144: 131-146.	4.29675e+06	3.82922e+06
99	94-3	57.3265	8.577	0	cm/yr	210Pb	low	de Haas et al. (1997) Mar. Geol. 144: 131-146.	4.2351e+06	3.80348e+06
100	95-7	57.0007	2.002	0	cm/yr	210Pb	no net sedimentation	de Haas et al. (1997) Mar. Geol. 144: 131-146.	3.83552e+06	3.79351e+06
101	94II-9	56.9992	4.0005	0	cm/yr	210Pb	no net sedimentation	de Haas et al. (1997) Mar. Geol. 144: 131-146.	3.95641e+06	3.78148e+06
102	94II-2	57.0085	8.013	0	cm/yr	210Pb	no net sedimentation	de Haas et al. (1997) Mar. Geol. 144: 131-146.	4.20008e+06	3.76892e+06
103	94II-10	57.0018	5.91817	0	cm/yr	210Pb	0.05 (?)	de Haas et al. (1997) Mar. Geol. 144: 131-146.	4.07275e+06	3.77358e+06
104	95-6	56.6498	0.729	0.18	cm/yr	210Pb		de Haas et al. (1997) Mar. Geol. 144: 131-146.	3.75352e+06	3.76408e+06
105	94II-7	56.5045	0.002	0	cm/yr	210Pb	0.14 (?)	de Haas et al. (1997) Mar. Geol. 144: 131-146.	3.70703e+06	3.75404e+06
106	95-5	55.9982	1.33967	0	cm/yr	210Pb	0.07 (?)	de Haas et al. (1997) Mar. Geol. 144: 131-146.	3.78168e+06	3.68737e+06
107	94-2	55.9975	7.66867	0	cm/yr	210Pb	no net sedimentation	de Haas et al. (1997) Mar. Geol. 144: 131-146.	4.17537e+06	3.65713e+06
108	94II-11	55	3.008	0	cm/yr	210Pb	no net sedimentation	de Haas et al. (1997) Mar. Geol. 144: 131-146.	3.87409e+06	3.56544e+06
109	95-4	54.7525	1.32883	0	cm/yr	210Pb	no net sedimentation	de Haas et al. (1997) Mar. Geol. 144: 131-146.	3.76395e+06	3.54973e+06
110	94-5	54.3332	6.25267	0	cm/yr	210Pb	no net sedimentation	de Haas et al. (1997) Mar. Geol. 144: 131-146.	4.07721e+06	3.47588e+06
111	94II-12	54.1208	1.68667	0	cm/yr	210Pb	low	de Haas et al. (1997) Mar. Geol. 144: 131-146.	3.7786e+06	3.47713e+06
112	95-2	53.6602	1.5405	0	cm/yr	210Pb	no net sedimentation	de Haas et al. (1997) Mar. Geol. 144: 131-146.	3.76304e+06	3.42728e+06
113	94-6	53.7138	4.4845	0	cm/yr	210Pb	no net sedimentation	de Haas et al. (1997) Mar. Geol. 144: 131-146.	3.9571e+06	3.41449e+06
114	95-3	53.4825	0.647833	0.1	cm/yr	210Pb		de Haas et al. (1997) Mar. Geol. 144: 131-146.	3.70196e+06	3.41489e+06
115	94II-1	53.6187	5.99517	0	cm/yr	210Pb	no net sedimentation	de Haas et al. (1997) Mar. Geol. 144: 131-146.	4.05601e+06	3.39736e+06
116	94-8	53.0062	3.91267	0	cm/yr	210Pb	no net sedimentation	de Haas et al. (1997) Mar. Geol. 144: 131-146.	3.9128e+06	3.339e+06
117	94-7	52.7145	4.00017	0	cm/yr	210Pb	no net sedimentation	de Haas et al. (1997) Mar. Geol. 144: 131-146.	3.91596e+06	3.30615e+06
118	95-1	52.4463	3.20817	0	cm/yr	210Pb	no net sedimentation	de Haas et al. (1997) Mar. Geol. 144: 131-146.	3.85987e+06	3.28112e+06
18		58.8667	10.3167	0.92	cm/yr	210Pb		Dennegård et al. (1992) Univ. Göteborg, Dep. Mar. Geol. Rep., 7, 164pp.	4.33923e+06	3.97395e+06
72		57.8667	10.0167	0.52	cm/yr	210Pb		Dennegård et al. (1992) Univ. Göteborg, Dep. Mar. Geol. Rep., 7, 164pp.	4.32191e+06	3.86271e+06
19		58.7717	10.1433	1.1	cm/yr	210Pb		Erlenkeuser and Pederstad (1984) Nor. Geol. Tidsskr., 64:135-152.	4.32923e+06	3.96336e+06
67		57.9967	9.33333	0.2	cm/yr	210Pb		Erlenkeuser and Pederstad (1984) Nor. Geol. Tidsskr., 64:135-152.	4.28143e+06	3.87735e+06
73		57.8633	8.18	0.25	cm/yr	210Pb		Erlenkeuser and Pederstad (1984) Nor. Geol. Tidsskr., 64:135-152.	4.21274e+06	3.86371e+06
74		57.915	9.24667	0.16	cm/yr	210Pb		Erlenkeuser and Pederstad (1984) Nor. Geol. Tidsskr., 64:135-152.	4.2762e+06	3.86832e+06
48		58.0817	9.61667	0.75	cm/yr	210Pb		Hass (1993) Mar. Geol., 111: 361-378.	4.29827e+06	3.88668e+06
58		58.0383	9.6192	0.97	cm/yr	210Pb		Hass (1996) Palaeo. Palaeo. Palaeo., 123: 121-145.	4.29839e+06	3.88186e+06
79		57.8383	8.7067	0.23	cm/yr	210Pb		Hass (1996) Palaeo. Palaeo. Palaeo., 123: 121-145.	4.24399e+06	3.86025e+06
83		57.7733	8.7117	0.22	cm/yr	210Pb		Hass (1996) Palaeo. Palaeo. Palaeo., 123: 121-145.	4.24415e+06	3.85301e+06
59		58.0767	10.0667	0.29	cm/yr	210Pb		Iversen and Jørgensen (1985) Limnol. Oceanogr., 30: 944-955.	4.32486e+06	3.88607e+06
68		57.9965	9.32683	0.3	cm/yr	210Pb		Jørgensen et al. (1981) Spec. Publ. Int. Assoc. Sedimentol., 5: 397-414.	4.28105e+06	3.87734e+06
75		57.9138	9.24583	0.15	cm/yr	210Pb		Jørgensen et al. (1981) Spec. Publ. Int. Assoc. Sedimentol., 5: 397-414.	4.27615e+06	3.86819e+06
49		58.15	9.95	0.29	cm/yr	210Pb		Jørgensen et al. (1990) Mar. Ecol. Prog. Ser., 59:39-54.	4.31797e+06	3.89422e+06
50		58.1413	9.94567	0.29	cm/yr	210Pb		Jørgensen et al. (1990) Mar. Ecol. Prog. Ser., 59:39-54.	4.31771e+06	3.89326e+06
51		58.125	10.8433	0.3	cm/yr	210Pb		Meyenburg and Liebezeit (1993) Mar. Geol., 111: 337-344.	4.37069e+06	3.89173e+06
43		58.1893	9.8125	0.98	cm/yr	210Pb		Müller and Irion (1984) Mitt. Geol. Paläontol. Inst. Univ. Hamburg, 56: 413-421.	4.30987e+06	3.89861e+06
60		58.0273	6.5245	0.08	cm/yr	210Pb		Nioz (Henk De Haas)	4.11534e+06	3.88558e+06
69		57.9573	6.504	0.15	cm/yr	210Pb		Nioz (Henk De Haas)	4.11373e+06	3.87786e+06
76		57.8915	7.07333	0.34	cm/yr	210Pb		Nioz (Henk De Haas)	4.14713e+06	3.86903e+06
80		57.78	6.98233	0.27	cm/yr	210Pb		Nioz (Henk De Haas)	4.14119e+06	3.85686e+06
88		57.6577	6.641	0.18	cm/yr	210Pb		Nioz (Henk De Haas)	4.12021e+06	3.84418e+06
92		57.5783	6.99833	0.09	cm/yr	210Pb		Nioz (Henk De Haas)	4.14116e+06	3.83441e+06
89		57.6667	7.09167	0.18	cm/yr	210Pb		Thiede (1985) Nor. Geol. Tidsskr., 65: 13-130.	4.14716e+06	3.844e+06
31		58.3333	9.8	0.4	cm/yr	210Pb		van Weering et al. (1987) Neth. J. Sea. Res., 21: 177-189.	4.30918e+06	3.91462e+06
32		58.3333	10.3	0.44	cm/yr	210Pb		van Weering et al. (1987) Neth. J. Sea. Res., 21: 177-189.	4.33852e+06	3.91464e+06
33		58.3333	10.82	0.34	cm/yr	210Pb		van Weering et al. (1987) Neth. J. Sea. Res., 21: 177-189.	4.36904e+06	3.91488e+06
36		58.225	9.33333	0.18	cm/yr	210Pb		van Weering et al. (1987) Neth. J. Sea. Res., 21: 177-189.	4.28168e+06	3.90274e+06
37		58.225	9.2	0.18	cm/yr	210Pb		van Weering et al. (1987) Neth. J. Sea. Res., 21: 177-189.	4.27383e+06	3.90282e+06
52		58.1417	8.83333	0.22	cm/yr	210Pb		van Weering et al. (1987) Neth. J. Sea. Res., 21: 177-189.	4.2521e+06	3.89385e+06
61		58.045	9.675	0.08	cm/yr	210Pb		van Weering et al. (1987) Neth. J. Sea. Res., 21: 177-189.	4.30169e+06	3.88259e+06
62		58.075	8.88333	0.11	cm/yr	210Pb		van Weering et al. (1987) Neth. J. Sea. Res., 21: 177-189.	4.25492e+06	3.88639e+06
70		57.955	9.82167	0.28	cm/yr	210Pb		van Weering et al. (1987) Neth. J. Sea. Res., 21: 177-189.	4.31034e+06	3.87255e+06
77		57.8633	8.25	0.23	cm/yr	210Pb		van Weering et al. (1987) Neth. J. Sea. Res., 21: 177-189.	4.2169e+06	3.86361e+06
84		57.7417	8.33333	0.14	cm/yr	210Pb		van Weering et al. (1987) Neth. J. Sea. Res., 21: 177-189.	4.22153e+06	3.84996e+06
85		57.7833	9.1	0.21	cm/yr	210Pb		van Weering et al. (1987) Neth. J. Sea. Res., 21: 177-189.	4.2673e+06	3.85378e+06
90		57.6417	8.4	0.21	cm/yr	210Pb		van Weering et al. (1987) Neth. J. Sea. Res., 21: 177-189.	4.22524e+06	3.83875e+06
96		57.5	8.5	0.12	cm/yr	210Pb		van Weering et al. (1987) Neth. J. Sea. Res., 21: 177-189.	4.23088e+06	3.82287e+06
24		58.587	9.59733	0.26	cm/yr	210Pb		van Weering et al. (1993) Mar. Geol., 111: 269-285.	4.29746e+06	3.94288e+06
25		58.5912	9.93283	0.28	cm/yr	210Pb		van Weering et al. (1993) Mar. Geol., 111: 269-285.	4.31701e+06	3.94328e+06
26		58.5957	10.5892	0.54	cm/yr	210Pb		van Weering et al. (1993) Mar. Geol., 111: 269-285.	4.35524e+06	3.94392e+06
34		58.3	10.7038	0.22	cm/yr	210Pb		van Weering et al. (1993) Mar. Geol., 111: 269-285.	4.36226e+06	3.9111e+06
38		58.2348	10.09	0.38	cm/yr	210Pb		van Weering et al. (1993) Mar. Geol., 111: 269-285.	4.32621e+06	3.90366e+06
44		58.187	8.9755	0.31	cm/yr	210Pb		van Weering et al. (1993) Mar. Geol., 111: 269-285.	4.26056e+06	3.89877e+06
53		58.0783	9.14733	0.18	cm/yr	210Pb		van Weering et al. (1993) Mar. Geol., 111: 269-285.	4.27053e+06	3.88655e+06
97		57.5288	9.49917	0	cm/yr	210Pb	0.19 (?)	van Weering et al. (1993) Mar. Geol., 111: 269-285.	4.29088e+06	3.82524e+06
119				0	cm/yr		randomly selected point		3.58459e+06	3.92443e+06
120				0	cm/yr		randomly selected point		3.70968e+06	3.88511e+06
121				0	cm/yr		randomly selected point		3.62476e+06	3.67657e+06
122				0	cm/yr		randomly selected point		3.74931e+06	3.22809e+06
123				0	cm/yr		randomly selected point		3.87409e+06	3.52935e+06
124				0	cm/yr		randomly selected point		3.82908e+06	3.41033e+06
125				0	cm/yr		randomly selected point		3.83726e+06	3.54449e+06
126				0	cm/yr		randomly selected point		3.63389e+06	3.86818e+06
127				0	cm/yr		randomly selected point		3.92852e+06	3.37805e+06
128				0	cm/yr		randomly selected point		4.14516e+06	3.57045e+06
129				0	cm/yr		randomly selected point		3.67486e+06	4.00658e+06
130				0	cm/yr		randomly selected point		4.14435e+06	3.53891e+06
131				0	cm/yr		randomly selected point		3.81955e+06	3.27759e+06
132				0	cm/yr		randomly selected point		4.16545e+06	3.61845e+06
133				0	cm/yr		randomly selected point		3.89918e+06	3.88712e+06
134				0	cm/yr		randomly selected point		3.92666e+06	4.13222e+06
135				0	cm/yr		randomly selected point		3.73787e+06	3.9102e+06
136				0	cm/yr		randomly selected point		4.12709e+06	3.59196e+06
137				0	cm/yr		randomly selected point		3.72496e+06	4.03738e+06
138				0	cm/yr		randomly selected point		3.61133e+06	3.98861e+06
139				0	cm/yr		randomly selected point		3.58733e+06	3.76157e+06
140				0	cm/yr		randomly selected point		3.86247e+06	3.38049e+06
141				0	cm/yr		randomly selected point		3.83095e+06	3.90754e+06
142				0	cm/yr		randomly selected point		4.06572e+06	3.81149e+06
143				0	cm/yr		randomly selected point		3.80878e+06	3.44065e+06
144				0	cm/yr		randomly selected point		3.8299e+06	3.73627e+06
145				0	cm/yr		randomly selected point		3.78073e+06	3.86185e+06
146				0	cm/yr		randomly selected point		4.20636e+06	3.57475e+06
147				0	cm/yr		randomly selected point		3.72087e+06	3.81961e+06
148				0	cm/yr		randomly selected point		4.01766e+06	3.40033e+06
149				0	cm/yr		randomly selected point		3.814e+06	3.35364e+06
150				0	cm/yr		randomly selected point		3.71703e+06	4.10884e+06
151				0	cm/yr		randomly selected point		3.73728e+06	4.17797e+06
152				0	cm/yr		randomly selected point		3.69304e+06	3.95873e+06
153				0	cm/yr		randomly selected point		3.80802e+06	3.56156e+06
154				0	cm/yr		randomly selected point		3.8303e+06	3.9651e+06
155				0	cm/yr		randomly selected point		4.00705e+06	3.67989e+06
156				0	cm/yr		randomly selected point		3.82096e+06	3.68382e+06
157				0	cm/yr		randomly selected point		4.16926e+06	3.68887e+06
158				0	cm/yr		randomly selected point		3.86313e+06	3.33048e+06
159				0	cm/yr		randomly selected point		4.14963e+06	3.78139e+06
160				0	cm/yr		randomly selected point		4.00426e+06	3.82535e+06
161				0	cm/yr		randomly selected point		4.05028e+06	3.85005e+06
162				0	cm/yr		randomly selected point		3.77229e+06	3.99751e+06
163				0	cm/yr		randomly selected point		3.84866e+06	3.35246e+06
164				0	cm/yr		randomly selected point		3.71152e+06	3.93993e+06
165				0	cm/yr		randomly selected point		3.78298e+06	3.75774e+06
166				0	cm/yr		randomly selected point		3.84377e+06	3.64193e+06
167				0	cm/yr		randomly selected point		3.92292e+06	3.63597e+06
168				0	cm/yr		randomly selected point		3.8691e+06	3.43602e+06
169				0	cm/yr		randomly selected point		3.91224e+06	3.66967e+06
170				0	cm/yr		randomly selected point		3.70282e+06	3.62348e+06
171				0	cm/yr		randomly selected point		3.68782e+06	3.57849e+06
172				0	cm/yr		randomly selected point		3.70228e+06	4.02487e+06
173				0	cm/yr		randomly selected point		3.96681e+06	3.35888e+06
174				0	cm/yr		randomly selected point		3.84803e+06	3.2031e+06
175				0	cm/yr		randomly selected point		4.14185e+06	3.69368e+06
176				0	cm/yr		randomly selected point		3.73848e+06	3.788e+06
177				0	cm/yr		randomly selected point		3.60356e+06	3.70473e+06
178				0	cm/yr		randomly selected point		4.19988e+06	3.54361e+06
179				0	cm/yr		randomly selected point		3.67878e+06	4.05888e+06
180				0	cm/yr		randomly selected point		3.75332e+06	3.68935e+06
181				0	cm/yr		randomly selected point		3.90412e+06	4.03328e+06
182				0	cm/yr		randomly selected point		4.18144e+06	3.7374e+06
183				0	cm/yr		randomly selected point		3.55115e+06	3.96487e+06
184				0	cm/yr		randomly selected point		3.85379e+06	3.89085e+06
185				0	cm/yr		randomly selected point		3.94108e+06	3.92366e+06
186				0	cm/yr		randomly selected point		4.17595e+06	3.48622e+06
187				0	cm/yr		randomly selected point		3.69471e+06	3.44001e+06
188				0	cm/yr		randomly selected point		3.79768e+06	4.16058e+06
189				0	cm/yr		randomly selected point		3.80527e+06	3.77787e+06
190				0	cm/yr		randomly selected point		4.16968e+06	3.52916e+06
191				0	cm/yr		randomly selected point		3.82705e+06	4.16883e+06
192				0	cm/yr		randomly selected point		3.93609e+06	3.61324e+06
193				0	cm/yr		randomly selected point		3.77717e+06	4.03654e+06
194				0	cm/yr		randomly selected point		3.7307e+06	3.84742e+06
195				0	cm/yr		randomly selected point		3.81794e+06	4.001e+06
196				0	cm/yr		randomly selected point		3.9083e+06	3.5634e+06
197				0	cm/yr		randomly selected point		4.09246e+06	3.80556e+06
198				0	cm/yr		randomly selected point		3.91014e+06	3.94295e+06
199				0	cm/yr		randomly selected point		3.75639e+06	4.2237e+06
200				0	cm/yr		randomly selected point		3.6517e+06	4.0216e+06
201				0	cm/yr		randomly selected point		3.86003e+06	3.72377e+06
202				0	cm/yr		randomly selected point		3.9619e+06	3.68568e+06
203				0	cm/yr		randomly selected point		3.68876e+06	3.85661e+06
204				0	cm/yr		randomly selected point		3.72472e+06	3.699e+06
205				0	cm/yr		randomly selected point		3.93558e+06	3.73397e+06
206				0	cm/yr		randomly selected point		3.72687e+06	3.44825e+06
207				0	cm/yr		randomly selected point		3.90571e+06	3.72303e+06
208				0	cm/yr		randomly selected point		3.88571e+06	3.95474e+06
209				0	cm/yr		randomly selected point		3.84206e+06	4.20315e+06
210				0	cm/yr		randomly selected point		4.17367e+06	3.80172e+06
211				0	cm/yr		randomly selected point		3.97766e+06	3.83426e+06
212				0	cm/yr		randomly selected point		3.68547e+06	4.09216e+06
213				0	cm/yr		randomly selected point		3.62269e+06	3.84582e+06
214				0	cm/yr		randomly selected point		3.63375e+06	3.78842e+06
215				0	cm/yr		randomly selected point		3.87351e+06	3.79923e+06
216				0	cm/yr		randomly selected point		3.64561e+06	3.75342e+06
217				0	cm/yr		randomly selected point		4.02034e+06	3.5918e+06
218				0	cm/yr		randomly selected point		3.99623e+06	3.77445e+06
