# Supplementary material for: Organic carbon in surface sediments of the North Sea and Skagerrak
Source: Copernicus journal article supplement (doi:10.5194/bg-2020-352), 2020-10-06
Supplement: Supplementary file 2 [file SupplementaryDataTable2.xlsx]

## Sheet: OCdens
Station	Latitude	Longitude	Depth_m	Date	OC_from_cm	OC_to_cm	Count_OC	OC	OC_unit	Porosity	Por_unit	Por_dep_cm	DBD	DBD_unit	OC_density	OCden_unit	Source	Remarks	POINT_X	POINT_Y
NGU-2	58.9943	10.674	460		0	10	5	2.1304	percent	84.1345	percent	4-8	436.3	kg/m3	9.29494	kg/m3	NGU rapport 95.054 (Porosity, DBD)	DBD calculated from weight of dry sample and volume of wet sample. Porosity calculated with grain density of 2700 kg/m3.	4.35982e+06	3.98834e+06
NGU-3	58.9635	10.3783	108		0	10	5	1.28196	percent	72.8045	percent	4-8	747.875	kg/m3	9.58746	kg/m3	NGU rapport 95.054 (Porosity, DBD)	DBD calculated from weight of dry sample and volume of wet sample. Porosity calculated with grain density of 2700 kg/m3.	4.34281e+06	3.98479e+06
NGU-4	58.9183	10.481	159		0	10	5	1.948	percent	80.9345	percent	4-8	524.3	kg/m3	10.2134	kg/m3	NGU rapport 95.054 (Porosity, DBD)	DBD calculated from weight of dry sample and volume of wet sample. Porosity calculated with grain density of 2700 kg/m3.	4.34877e+06	3.9798e+06
NGU-5	58.8557	10.581	120		0	10	5	1.8042	percent	83.6982	percent	4-8	448.3	kg/m3	8.08823	kg/m3	NGU rapport 95.054 (Porosity, DBD)	DBD calculated from weight of dry sample and volume of wet sample. Porosity calculated with grain density of 2700 kg/m3.	4.3546e+06	3.97288e+06
NGU-6	58.6958	10.4832	140		0	10	5	1.8626	percent	78.0982	percent	4-8	602.3	kg/m3	11.2184	kg/m3	NGU rapport 95.054 (Porosity, DBD)	DBD calculated from weight of dry sample and volume of wet sample. Porosity calculated with grain density of 2700 kg/m3.	4.34907e+06	3.95507e+06
NGU-7	58.7508	10.3488	167		0	10	5	1.9364	percent	80.4255	percent	4-8	538.3	kg/m3	10.4236	kg/m3	NGU rapport 95.054 (Porosity, DBD)	DBD calculated from weight of dry sample and volume of wet sample. Porosity calculated with grain density of 2700 kg/m3.	4.34123e+06	3.96114e+06
NGU-8	58.8122	10.2457	184		0	10	5	1.9694	percent	82.4409	percent	4-8	482.875	kg/m3	9.50974	kg/m3	NGU rapport 95.054 (Porosity, DBD)	DBD calculated from weight of dry sample and volume of wet sample. Porosity calculated with grain density of 2700 kg/m3.	4.33522e+06	3.96793e+06
NGU-9	58.8868	10.0683	211		0	10	5	1.8418	percent	81.4436	percent	4-8	510.3	kg/m3	9.39871	kg/m3	NGU rapport 95.054 (Porosity, DBD)	DBD calculated from weight of dry sample and volume of wet sample. Porosity calculated with grain density of 2700 kg/m3.	4.32495e+06	3.97621e+06
NGU-10	58.8742	9.842	349		0	10	5	2.1222	percent	83.1227	percent	4-8	464.125	kg/m3	9.84966	kg/m3	NGU rapport 95.054 (Porosity, DBD)	DBD calculated from weight of dry sample and volume of wet sample. Porosity calculated with grain density of 2700 kg/m3.	4.31187e+06	3.97481e+06
NGU-11	58.8077	9.964	184		0	10	5	0.89648	percent	68.28	percent	4-8	872.3	kg/m3	7.82	kg/m3	NGU rapport 95.054 (Porosity, DBD)	DBD calculated from weight of dry sample and volume of wet sample. Porosity calculated with grain density of 2700 kg/m3.	4.31892e+06	3.96741e+06
NGU-12	58.7453	10.0957	262		0	10	5	2.2622	percent	81.7345	percent	4-8	502.3	kg/m3	11.363	kg/m3	NGU rapport 95.054 (Porosity, DBD)	DBD calculated from weight of dry sample and volume of wet sample. Porosity calculated with grain density of 2700 kg/m3.	4.32655e+06	3.96048e+06
NGU-13	58.6853	10.2222	277		0	10	5	2.2066	percent	82.7891	percent	4-8	473.3	kg/m3	10.4438	kg/m3	NGU rapport 95.054 (Porosity, DBD)	DBD calculated from weight of dry sample and volume of wet sample. Porosity calculated with grain density of 2700 kg/m3.	4.33391e+06	3.95382e+06
NGU-14	58.6245	10.3517	242		0	10	5	2.0792	percent	81.8073	percent	4-8	500.3	kg/m3	10.4022	kg/m3	NGU rapport 95.054 (Porosity, DBD)	DBD calculated from weight of dry sample and volume of wet sample. Porosity calculated with grain density of 2700 kg/m3.	4.34147e+06	3.94709e+06
NGU-15	58.5583	10.2487	334		2	10	4	2.44575	percent	86.6182	percent	4-8	368	kg/m3	9.00036	kg/m3	NGU rapport 95.054 (Porosity, DBD)	DBD calculated from weight of dry sample and volume of wet sample. Porosity calculated with grain density of 2700 kg/m3.	4.3355e+06	3.93971e+06
NGU-16	58.618	10.1018	420		0	10	5	2.4346	percent	82.3273	percent	4-8	486	kg/m3	11.8322	kg/m3	NGU rapport 95.054 (Porosity, DBD)	DBD calculated from weight of dry sample and volume of wet sample. Porosity calculated with grain density of 2700 kg/m3.	4.32693e+06	3.94632e+06
NGU-17	58.6795	9.97317	550		0	10	5	2.5824	percent	80	percent	4-8	550	kg/m3	14.2032	kg/m3	NGU rapport 95.054 (Porosity, DBD)	DBD calculated from weight of dry sample and volume of wet sample. Porosity calculated with grain density of 2700 kg/m3.	4.31944e+06	3.95316e+06
NGU-18	58.7393	9.848	404		0	10	5	2.3028	percent	80.4727	percent	4-8	537	kg/m3	12.366	kg/m3	NGU rapport 95.054 (Porosity, DBD)	DBD calculated from weight of dry sample and volume of wet sample. Porosity calculated with grain density of 2700 kg/m3.	4.31218e+06	3.95982e+06
NGU-19	58.8005	9.72117	284		0	10	5	2.0134	percent	83.8545	percent	4-8	444	kg/m3	8.9395	kg/m3	NGU rapport 95.054 (Porosity, DBD)	DBD calculated from weight of dry sample and volume of wet sample. Porosity calculated with grain density of 2700 kg/m3.	4.30485e+06	3.96664e+06
NGU-21	58.6748	9.73067	377		0	10	5	2.403	percent	80.2545	percent	4-8	543	kg/m3	13.0483	kg/m3	NGU rapport 95.054 (Porosity, DBD)	DBD calculated from weight of dry sample and volume of wet sample. Porosity calculated with grain density of 2700 kg/m3.	4.30535e+06	3.95267e+06
NGU-22	58.6155	9.86167	455		2	10	4	2.27375	percent	83.8909	percent	4-8	443	kg/m3	10.0727	kg/m3	NGU rapport 95.054 (Porosity, DBD)	DBD calculated from weight of dry sample and volume of wet sample. Porosity calculated with grain density of 2700 kg/m3.	4.31295e+06	3.94605e+06
NGU-23	58.554	9.98933	531		0	10	5	2.2014	percent	83.9273	percent	4-8	442	kg/m3	9.73019	kg/m3	NGU rapport 95.054 (Porosity, DBD)	DBD calculated from weight of dry sample and volume of wet sample. Porosity calculated with grain density of 2700 kg/m3.	4.32038e+06	3.9392e+06
NGU-24	58.4938	10.1175	491		0	10	5	2.197	percent	80.0727	percent	4-8	548	kg/m3	12.0396	kg/m3	NGU rapport 95.054 (Porosity, DBD)	DBD calculated from weight of dry sample and volume of wet sample. Porosity calculated with grain density of 2700 kg/m3.	4.32786e+06	3.93252e+06
NGU-25	58.4282	9.9955	551		0	10	5	2.1406	percent	81.0545	percent	4-8	521	kg/m3	11.1525	kg/m3	NGU rapport 95.054 (Porosity, DBD)	DBD calculated from weight of dry sample and volume of wet sample. Porosity calculated with grain density of 2700 kg/m3.	4.32074e+06	3.92521e+06
NGU-26	58.4895	9.86517	505		0	10	5	1.9168	percent	80.4727	percent	4-8	537	kg/m3	10.2932	kg/m3	NGU rapport 95.054 (Porosity, DBD)	DBD calculated from weight of dry sample and volume of wet sample. Porosity calculated with grain density of 2700 kg/m3.	4.31312e+06	3.93204e+06
NGU-27	58.5538	9.731	481		0	10	5	2.126	percent	80.8364	percent	4-8	527	kg/m3	11.204	kg/m3	NGU rapport 95.054 (Porosity, DBD)	DBD calculated from weight of dry sample and volume of wet sample. Porosity calculated with grain density of 2700 kg/m3.	4.30531e+06	3.93921e+06
NGU-28	58.6098	9.61133	556		0	10	5	2.1488	percent	83.8182	percent	4-8	445	kg/m3	9.56216	kg/m3	NGU rapport 95.054 (Porosity, DBD)	DBD calculated from weight of dry sample and volume of wet sample. Porosity calculated with grain density of 2700 kg/m3.	4.29837e+06	3.94547e+06
NGU-29	58.6677	9.48117	312		0	10	5	2.32	percent	85.0909	percent	4-8	410	kg/m3	9.512	kg/m3	NGU rapport 95.054 (Porosity, DBD)	DBD calculated from weight of dry sample and volume of wet sample. Porosity calculated with grain density of 2700 kg/m3.	4.29084e+06	3.95195e+06
NGU-31	58.54	9.49267	526		0	10	5	2.2924	percent	83.7818	percent	4-8	446	kg/m3	10.2241	kg/m3	NGU rapport 95.054 (Porosity, DBD)	DBD calculated from weight of dry sample and volume of wet sample. Porosity calculated with grain density of 2700 kg/m3.	4.2914e+06	3.93775e+06
NGU-32	58.48	9.62783	596		0	10	5	2.0646	percent	82.1818	percent	4-8	490	kg/m3	10.1165	kg/m3	NGU rapport 95.054 (Porosity, DBD)	DBD calculated from weight of dry sample and volume of wet sample. Porosity calculated with grain density of 2700 kg/m3.	4.29925e+06	3.93103e+06
NGU-33	58.422	9.748	616		0	10	5	2.109	percent	85.7455	percent	4-8	392	kg/m3	8.26728	kg/m3	NGU rapport 95.054 (Porosity, DBD)	DBD calculated from weight of dry sample and volume of wet sample. Porosity calculated with grain density of 2700 kg/m3.	4.30625e+06	3.92455e+06
NGU-34	58.3613	9.88117	527		0	10	5	1.9872	percent	79.6	percent	4-8	561	kg/m3	11.1482	kg/m3	NGU rapport 95.054 (Porosity, DBD)	DBD calculated from weight of dry sample and volume of wet sample. Porosity calculated with grain density of 2700 kg/m3.	4.31403e+06	3.91778e+06
NGU-35	58.285	10.0415	488		0	10	5	2.4132	percent	81.2	percent	4-8	517	kg/m3	12.4762	kg/m3	NGU rapport 95.054 (Porosity, DBD)	DBD calculated from weight of dry sample and volume of wet sample. Porosity calculated with grain density of 2700 kg/m3.	4.32344e+06	3.90929e+06
NGU-36	58.2167	9.92683	461		0	10	5	2.549	percent	76.6182	percent	4-8	643	kg/m3	16.3901	kg/m3	NGU rapport 95.054 (Porosity, DBD)	DBD calculated from weight of dry sample and volume of wet sample. Porosity calculated with grain density of 2700 kg/m3.	4.31669e+06	3.90169e+06
NGU-37	58.5328	9.2665	296		0	10	5	2.1464	percent	82.9091	percent	4-8	470	kg/m3	10.0881	kg/m3	NGU rapport 95.054 (Porosity, DBD)	DBD calculated from weight of dry sample and volume of wet sample. Porosity calculated with grain density of 2700 kg/m3.	4.2782e+06	3.93707e+06
NGU-38	58.4748	9.39333	414		0	10	5	2.2614	percent	85.8545	percent	4-8	389	kg/m3	8.79685	kg/m3	NGU rapport 95.054 (Porosity, DBD)	DBD calculated from weight of dry sample and volume of wet sample. Porosity calculated with grain density of 2700 kg/m3.	4.28554e+06	3.93055e+06
NGU-39	58.4152	9.5055	538		0	10	5	1.9664	percent	80.8364	percent	4-8	527	kg/m3	10.3629	kg/m3	NGU rapport 95.054 (Porosity, DBD)	DBD calculated from weight of dry sample and volume of wet sample. Porosity calculated with grain density of 2700 kg/m3.	4.29205e+06	3.92386e+06
NGU-40	58.3547	9.6295	648		0	10	5	1.9732	percent	81.8182	percent	4-8	500	kg/m3	9.866	kg/m3	NGU rapport 95.054 (Porosity, DBD)	DBD calculated from weight of dry sample and volume of wet sample. Porosity calculated with grain density of 2700 kg/m3.	4.29927e+06	3.91709e+06
NGU-41	58.2967	9.75783	609		0	10	5	2.082	percent	82.6182	percent	4-8	478	kg/m3	9.95196	kg/m3	NGU rapport 95.054 (Porosity, DBD)	DBD calculated from weight of dry sample and volume of wet sample. Porosity calculated with grain density of 2700 kg/m3.	4.30678e+06	3.91061e+06
NGU-42	58.1617	9.78667	463		0	10	5	2.4788	percent	81.3818	percent	4-8	512	kg/m3	12.6915	kg/m3	NGU rapport 95.054 (Porosity, DBD)	DBD calculated from weight of dry sample and volume of wet sample. Porosity calculated with grain density of 2700 kg/m3.	4.30842e+06	3.89559e+06
NGU-43	58.2323	9.6345	565		0	10	5	1.9424	percent	82.0364	percent	4-8	494	kg/m3	9.59546	kg/m3	NGU rapport 95.054 (Porosity, DBD)	DBD calculated from weight of dry sample and volume of wet sample. Porosity calculated with grain density of 2700 kg/m3.	4.29949e+06	3.90349e+06
NGU-44	58.2963	9.51133	662		0	10	5	2.0632	percent	84.6909	percent	4-8	421	kg/m3	8.68607	kg/m3	NGU rapport 95.054 (Porosity, DBD)	DBD calculated from weight of dry sample and volume of wet sample. Porosity calculated with grain density of 2700 kg/m3.	4.2923e+06	3.91065e+06
NGU-45	58.3535	9.3805	538		0	10	5	1.8954	percent	79.4545	percent	4-8	565	kg/m3	10.709	kg/m3	NGU rapport 95.054 (Porosity, DBD)	DBD calculated from weight of dry sample and volume of wet sample. Porosity calculated with grain density of 2700 kg/m3.	4.28467e+06	3.91706e+06
NGU-46	58.4098	9.27817	414		0	10	5	2.2582	percent	79.8909	percent	4-8	553	kg/m3	12.4878	kg/m3	NGU rapport 95.054 (Porosity, DBD)	DBD calculated from weight of dry sample and volume of wet sample. Porosity calculated with grain density of 2700 kg/m3.	4.27873e+06	3.92338e+06
NGU-47	58.4792	9.12817	263		0	10	5	2.058	percent	76.4364	percent	4-8	648	kg/m3	13.3358	kg/m3	NGU rapport 95.054 (Porosity, DBD)	DBD calculated from weight of dry sample and volume of wet sample. Porosity calculated with grain density of 2700 kg/m3.	4.27005e+06	3.93119e+06
NGU-48	58.406	9.026	283		0	10	5	2.0038	percent	82.3273	percent	4-8	486	kg/m3	9.73847	kg/m3	NGU rapport 95.054 (Porosity, DBD)	DBD calculated from weight of dry sample and volume of wet sample. Porosity calculated with grain density of 2700 kg/m3.	4.26396e+06	3.92313e+06
NGU-49	58.3383	9.1595	394		0	10	5	2.164	percent	81.8182	percent	4-8	500	kg/m3	10.82	kg/m3	NGU rapport 95.054 (Porosity, DBD)	DBD calculated from weight of dry sample and volume of wet sample. Porosity calculated with grain density of 2700 kg/m3.	4.27169e+06	3.91551e+06
NGU-50	58.2817	9.28033	560		0	10	5	1.6872	percent	78.2182	percent	4-8	599	kg/m3	10.1063	kg/m3	NGU rapport 95.054 (Porosity, DBD)	DBD calculated from weight of dry sample and volume of wet sample. Porosity calculated with grain density of 2700 kg/m3.	4.27871e+06	3.90913e+06
NGU-51	58.2253	9.40417	666		0	10	5	2.02	percent	82.8727	percent	4-8	471	kg/m3	9.5142	kg/m3	NGU rapport 95.054 (Porosity, DBD)	DBD calculated from weight of dry sample and volume of wet sample. Porosity calculated with grain density of 2700 kg/m3.	4.28593e+06	3.9028e+06
NGU-52	58.1617	9.52283	594		0	10	5	2.0734	percent	80.9091	percent	4-8	525	kg/m3	10.8854	kg/m3	NGU rapport 95.054 (Porosity, DBD)	DBD calculated from weight of dry sample and volume of wet sample. Porosity calculated with grain density of 2700 kg/m3.	4.29287e+06	3.89567e+06
NGU-53	58.1057	9.66383	425		0	10	5	2.655	percent	81.1273	percent	4-8	519	kg/m3	13.7795	kg/m3	NGU rapport 95.054 (Porosity, DBD)	DBD calculated from weight of dry sample and volume of wet sample. Porosity calculated with grain density of 2700 kg/m3.	4.30115e+06	3.88939e+06
NGU-54	58.0447	9.51783	419		0	10	5	2.58	percent	80.4	percent	4-8	539	kg/m3	13.9062	kg/m3	NGU rapport 95.054 (Porosity, DBD)	DBD calculated from weight of dry sample and volume of wet sample. Porosity calculated with grain density of 2700 kg/m3.	4.29248e+06	3.88266e+06
NGU-55	58.0965	9.41467	571		0	10	5	2.1486	percent	83.4182	percent	4-8	456	kg/m3	9.79762	kg/m3	NGU rapport 95.054 (Porosity, DBD)	DBD calculated from weight of dry sample and volume of wet sample. Porosity calculated with grain density of 2700 kg/m3.	4.28643e+06	3.88847e+06
NGU-56	58.155	9.29	652		0	10	5	2.1024	percent	85.3091	percent	4-8	404	kg/m3	8.4937	kg/m3	NGU rapport 95.054 (Porosity, DBD)	DBD calculated from weight of dry sample and volume of wet sample. Porosity calculated with grain density of 2700 kg/m3.	4.27913e+06	3.89504e+06
NGU-57	58.2107	9.17633	648		0	10	5	1.52862	percent	80.2909	percent	4-8	542	kg/m3	8.28512	kg/m3	NGU rapport 95.054 (Porosity, DBD)	DBD calculated from weight of dry sample and volume of wet sample. Porosity calculated with grain density of 2700 kg/m3.	4.2725e+06	3.9013e+06
NGU-58	58.2743	9.0485	404		0	10	5	2.2826	percent	82.5818	percent	4-8	479	kg/m3	10.9337	kg/m3	NGU rapport 95.054 (Porosity, DBD)	DBD calculated from weight of dry sample and volume of wet sample. Porosity calculated with grain density of 2700 kg/m3.	4.26508e+06	3.90848e+06
NGU-59	58.3325	8.92283	298		0	10	5	2.084	percent	84.7636	percent	4-8	419	kg/m3	8.73196	kg/m3	NGU rapport 95.054 (Porosity, DBD)	DBD calculated from weight of dry sample and volume of wet sample. Porosity calculated with grain density of 2700 kg/m3.	4.25779e+06	3.91505e+06
NGU-60	58.271	8.81383	286		0	10	5	2.124	percent	83.2	percent	4-8	462	kg/m3	9.81288	kg/m3	NGU rapport 95.054 (Porosity, DBD)	DBD calculated from weight of dry sample and volume of wet sample. Porosity calculated with grain density of 2700 kg/m3.	4.25128e+06	3.90831e+06
NGU-61	58.2085	8.94017	398		0	10	5	2.2076	percent	82.303	percent	4-8	486.667	kg/m3	10.7437	kg/m3	NGU rapport 95.054 (Porosity, DBD)	DBD calculated from weight of dry sample and volume of wet sample. Porosity calculated with grain density of 2700 kg/m3.	4.2586e+06	3.90125e+06
NGU-62	58.1495	9.0525	640		0	10	5	2.201	percent	84.6182	percent	4-8	423	kg/m3	9.31023	kg/m3	NGU rapport 95.054 (Porosity, DBD)	DBD calculated from weight of dry sample and volume of wet sample. Porosity calculated with grain density of 2700 kg/m3.	4.26512e+06	3.89459e+06
NGU-63	58.0943	9.18017	627		0	10	5	2.3394	percent	86.3838	percent	4-8	374.444	kg/m3	8.75975	kg/m3	NGU rapport 95.054 (Porosity, DBD)	DBD calculated from weight of dry sample and volume of wet sample. Porosity calculated with grain density of 2700 kg/m3.	4.27258e+06	3.88836e+06
NGU-64	58.0348	9.30117	514		0	10	5	2.4184	percent	80.8727	percent	4-8	526	kg/m3	12.7208	kg/m3	NGU rapport 95.054 (Porosity, DBD)	DBD calculated from weight of dry sample and volume of wet sample. Porosity calculated with grain density of 2700 kg/m3.	4.27965e+06	3.88167e+06
NGU-65	57.9878	9.3975	351		0	10	5	1.8168	percent	68.9091	percent	4-8	855	kg/m3	15.5336	kg/m3	NGU rapport 95.054 (Porosity, DBD)	DBD calculated from weight of dry sample and volume of wet sample. Porosity calculated with grain density of 2700 kg/m3.	4.28531e+06	3.87639e+06
NGU-66	57.931	9.26817	266		0	10	5	1.4976	percent	70	percent	4-8	825	kg/m3	12.3552	kg/m3	NGU rapport 95.054 (Porosity, DBD)	DBD calculated from weight of dry sample and volume of wet sample. Porosity calculated with grain density of 2700 kg/m3.	4.27758e+06	3.87014e+06
NGU-67	57.9702	9.18867	482		0	10	5	2.5646	percent	82.6182	percent	4-8	478	kg/m3	12.2588	kg/m3	NGU rapport 95.054 (Porosity, DBD)	DBD calculated from weight of dry sample and volume of wet sample. Porosity calculated with grain density of 2700 kg/m3.	4.27291e+06	3.87455e+06
NGU-68	58.0278	9.06667	584		0	10	5	2.2752	percent	83.5273	percent	4-8	453	kg/m3	10.3067	kg/m3	NGU rapport 95.054 (Porosity, DBD)	DBD calculated from weight of dry sample and volume of wet sample. Porosity calculated with grain density of 2700 kg/m3.	4.26577e+06	3.88105e+06
NGU-69	58.087	8.9495	640		0	10	5	2.0488	percent	81.3818	percent	4-8	512	kg/m3	10.4899	kg/m3	NGU rapport 95.054 (Porosity, DBD)	DBD calculated from weight of dry sample and volume of wet sample. Porosity calculated with grain density of 2700 kg/m3.	4.25894e+06	3.88773e+06
NGU-70	58.1438	8.83267	427		0	10	5	2.1948	percent	80.2909	percent	4-8	542	kg/m3	11.8958	kg/m3	NGU rapport 95.054 (Porosity, DBD)	DBD calculated from weight of dry sample and volume of wet sample. Porosity calculated with grain density of 2700 kg/m3.	4.25215e+06	3.89415e+06
NGU-71	58.2013	8.70583	312		0	10	5	2.1418	percent	83.7091	percent	4-8	448	kg/m3	9.59526	kg/m3	NGU rapport 95.054 (Porosity, DBD)	DBD calculated from weight of dry sample and volume of wet sample. Porosity calculated with grain density of 2700 kg/m3.	4.24479e+06	3.90068e+06
NGU-72	58.1453	8.5815	305		0	10	5	2.08	percent	83.1273	percent	4-8	464	kg/m3	9.6512	kg/m3	NGU rapport 95.054 (Porosity, DBD)	DBD calculated from weight of dry sample and volume of wet sample. Porosity calculated with grain density of 2700 kg/m3.	4.23734e+06	3.89459e+06
NGU-73	58.078	8.71583	469		0	10	5	2.00575	percent	80	percent	4-8	550	kg/m3	11.0316	kg/m3	NGU rapport 95.054 (Porosity, DBD)	DBD calculated from weight of dry sample and volume of wet sample. Porosity calculated with grain density of 2700 kg/m3.	4.24512e+06	3.88695e+06
NGU-74	58.0233	8.83333	594		0	10	5	1.9774	percent	84.9091	percent	4-8	415	kg/m3	8.20621	kg/m3	NGU rapport 95.054 (Porosity, DBD)	DBD calculated from weight of dry sample and volume of wet sample. Porosity calculated with grain density of 2700 kg/m3.	4.25196e+06	3.88075e+06
NGU-75	57.9642	8.95733	532		0	10	5	2.254	percent	82.5818	percent	4-8	479	kg/m3	10.7967	kg/m3	NGU rapport 95.054 (Porosity, DBD)	DBD calculated from weight of dry sample and volume of wet sample. Porosity calculated with grain density of 2700 kg/m3.	4.25919e+06	3.87406e+06
NGU-77	57.8581	9.1674	188		0	10	5	0.69524	percent	51.6306	percent	4-8	1330.16	kg/m3	9.24779	kg/m3	NGU rapport 95.054 (Porosity, DBD)	DBD calculated from weight of dry sample and volume of wet sample. Porosity calculated with grain density of 2700 kg/m3.	4.2715e+06	3.8621e+06
NGU-78	57.7944	9.05653	148		0	10	5	0.49666	percent	47.2767	percent	4-8	1449.89	kg/m3	7.20103	kg/m3	NGU rapport 95.054 (Porosity, DBD)	DBD calculated from weight of dry sample and volume of wet sample. Porosity calculated with grain density of 2700 kg/m3.	4.26481e+06	3.8551e+06
NGU-79	57.8415	8.96167	248		0	10	5	1.3872	percent	70.2817	percent	4-8	817.253	kg/m3	11.3369	kg/m3	NGU rapport 95.054 (Porosity, DBD)	DBD calculated from weight of dry sample and volume of wet sample. Porosity calculated with grain density of 2700 kg/m3.	4.25924e+06	3.86042e+06
NGU-80	57.8999	8.83988	519		0	10	5	2.6904	percent	80.7914	percent	4-8	528.238	kg/m3	14.2117	kg/m3	NGU rapport 95.054 (Porosity, DBD)	DBD calculated from weight of dry sample and volume of wet sample. Porosity calculated with grain density of 2700 kg/m3.	4.25211e+06	3.86703e+06
NGU-81	57.9598	8.71905	521		0	10	5	2.1334	percent	78.6079	percent	4-8	588.282	kg/m3	12.5504	kg/m3	NGU rapport 95.054 (Porosity, DBD)	DBD calculated from weight of dry sample and volume of wet sample. Porosity calculated with grain density of 2700 kg/m3.	4.24506e+06	3.8738e+06
NGU-82	58.0215	8.5924	534		0	10	5	2.2512	percent	81.4972	percent	4-8	508.827	kg/m3	11.4547	kg/m3	NGU rapport 95.054 (Porosity, DBD)	DBD calculated from weight of dry sample and volume of wet sample. Porosity calculated with grain density of 2700 kg/m3.	4.2377e+06	3.88081e+06
NGU-83	58.08	8.4711	414		0	10	5	2.2074	percent	81.8031	percent	4-8	500.415	kg/m3	11.0462	kg/m3	NGU rapport 95.054 (Porosity, DBD)	DBD calculated from weight of dry sample and volume of wet sample. Porosity calculated with grain density of 2700 kg/m3.	4.23066e+06	3.88746e+06
NGU-84	58.0163	8.35927	468		0	10	5	2.266	percent	80.2225	percent	4-8	543.882	kg/m3	12.3244	kg/m3	NGU rapport 95.054 (Porosity, DBD)	DBD calculated from weight of dry sample and volume of wet sample. Porosity calculated with grain density of 2700 kg/m3.	4.22389e+06	3.88052e+06
NGU-85	57.9552	8.48445	520		0	10	5	2.2478	percent	81.1542	percent	4-8	518.26	kg/m3	11.6494	kg/m3	NGU rapport 95.054 (Porosity, DBD)	DBD calculated from weight of dry sample and volume of wet sample. Porosity calculated with grain density of 2700 kg/m3.	4.23115e+06	3.87356e+06
NGU-86	57.8961	8.60453	536		0	10	5	2.2196	percent	81.1166	percent	4-8	519.292	kg/m3	11.5262	kg/m3	NGU rapport 95.054 (Porosity, DBD)	DBD calculated from weight of dry sample and volume of wet sample. Porosity calculated with grain density of 2700 kg/m3.	4.23813e+06	3.86685e+06
NGU-87	57.8344	8.72697	430		0	10	5	2.7096	percent	81.0909	percent	4-8	520	kg/m3	14.0899	kg/m3	NGU rapport 95.054 (Porosity, DBD)	DBD calculated from weight of dry sample and volume of wet sample. Porosity calculated with grain density of 2700 kg/m3.	4.24527e+06	3.85985e+06
NGU-88	57.7786	8.84035	197		0	10	5	1.5238	percent	77.5576	percent	4-8	617.167	kg/m3	9.40439	kg/m3	NGU rapport 95.054 (Porosity, DBD)	DBD calculated from weight of dry sample and volume of wet sample. Porosity calculated with grain density of 2700 kg/m3.	4.25191e+06	3.85354e+06
NGU-89	57.7266	8.94505	117		0	10	5	0.45034	percent	46.1934	percent	4-8	1479.68	kg/m3	6.6636	kg/m3	NGU rapport 95.054 (Porosity, DBD)	DBD calculated from weight of dry sample and volume of wet sample. Porosity calculated with grain density of 2700 kg/m3.	4.25806e+06	3.84765e+06
NGU-90	57.7091	8.73483	163		0	10	5	0.67504	percent	46.4511	percent	4-8	1472.59	kg/m3	9.9406	kg/m3	NGU rapport 95.054 (Porosity, DBD)	DBD calculated from weight of dry sample and volume of wet sample. Porosity calculated with grain density of 2700 kg/m3.	4.24548e+06	3.84591e+06
NGU-92	57.83	8.48735	504		0	10	5	2.3248	percent	83.4375	percent	4-8	455.468	kg/m3	10.5887	kg/m3	NGU rapport 95.054 (Porosity, DBD)	DBD calculated from weight of dry sample and volume of wet sample. Porosity calculated with grain density of 2700 kg/m3.	4.23101e+06	3.85964e+06
NGU-93	57.889	8.3669	514		0	10	5	2.2794	percent	79.9859	percent	4-8	550.387	kg/m3	12.5455	kg/m3	NGU rapport 95.054 (Porosity, DBD)	DBD calculated from weight of dry sample and volume of wet sample. Porosity calculated with grain density of 2700 kg/m3.	4.224e+06	3.86637e+06
NGU-94	57.9487	8.23973	500		0	10	5	2.323	percent	82.4608	percent	4-8	482.327	kg/m3	11.2045	kg/m3	NGU rapport 95.054 (Porosity, DBD)	DBD calculated from weight of dry sample and volume of wet sample. Porosity calculated with grain density of 2700 kg/m3.	4.21662e+06	3.87318e+06
NGU-95	58.0041	8.12715	285		0	10	5	2.0654	percent	81.6908	percent	4-8	503.502	kg/m3	10.3993	kg/m3	NGU rapport 95.054 (Porosity, DBD)	DBD calculated from weight of dry sample and volume of wet sample. Porosity calculated with grain density of 2700 kg/m3.	4.21012e+06	3.87951e+06
NGU-96	58.0044	7.9	176		0	10	5	0.99976	percent	65.5569	percent	4-8	947.186	kg/m3	9.46959	kg/m3	NGU rapport 95.054 (Porosity, DBD)	DBD calculated from weight of dry sample and volume of wet sample. Porosity calculated with grain density of 2700 kg/m3.	4.19667e+06	3.87992e+06
NGU-97	57.9435	8.01863	551		0	10	5	2.3198	percent	83.1874	percent	4-8	462.347	kg/m3	10.7255	kg/m3	NGU rapport 95.054 (Porosity, DBD)	DBD calculated from weight of dry sample and volume of wet sample. Porosity calculated with grain density of 2700 kg/m3.	4.2035e+06	3.87294e+06
NGU-98	57.884	8.133	504		0	10	5	2.2186	percent	79.4751	percent	4-8	564.436	kg/m3	12.5226	kg/m3	NGU rapport 95.054 (Porosity, DBD)	DBD calculated from weight of dry sample and volume of wet sample. Porosity calculated with grain density of 2700 kg/m3.	4.2101e+06	3.86615e+06
NGU-99	57.8223	8.26207	515		0	10	5	2.3634	percent	80.859	percent	4-8	526.376	kg/m3	12.4404	kg/m3	NGU rapport 95.054 (Porosity, DBD)	DBD calculated from weight of dry sample and volume of wet sample. Porosity calculated with grain density of 2700 kg/m3.	4.21759e+06	3.85909e+06
NGU-100	57.7509	8.40845	403		0	10	5	2.3374	percent	80.5813	percent	4-8	534.014	kg/m3	12.482	kg/m3	NGU rapport 95.054 (Porosity, DBD)	DBD calculated from weight of dry sample and volume of wet sample. Porosity calculated with grain density of 2700 kg/m3.	4.22611e+06	3.85094e+06
NGU-101	57.7039	8.50428	240		0	10	5	1.9618	percent	74.1622	percent	4-8	710.538	kg/m3	13.9393	kg/m3	NGU rapport 95.054 (Porosity, DBD)	DBD calculated from weight of dry sample and volume of wet sample. Porosity calculated with grain density of 2700 kg/m3.	4.23171e+06	3.8456e+06
NGU-102	57.6453	8.62442	140		0	10	5	0.57288	percent	47.5123	percent	4-8	1443.41	kg/m3	8.26902	kg/m3	NGU rapport 95.054 (Porosity, DBD)	DBD calculated from weight of dry sample and volume of wet sample. Porosity calculated with grain density of 2700 kg/m3.	4.23875e+06	3.83894e+06
NGU-103	57.6428	8.39418	197		0	10	5	1.21868	percent	59.3468	percent	4-8	1117.96	kg/m3	13.6244	kg/m3	NGU rapport 95.054 (Porosity, DBD)	DBD calculated from weight of dry sample and volume of wet sample. Porosity calculated with grain density of 2700 kg/m3.	4.22498e+06	3.83895e+06
NGU-104	57.6792	8.31882	262		0	10	5	2.7072	percent	79.8634	percent	4-8	553.757	kg/m3	14.9913	kg/m3	NGU rapport 95.054 (Porosity, DBD)	DBD calculated from weight of dry sample and volume of wet sample. Porosity calculated with grain density of 2700 kg/m3.	4.22058e+06	3.8431e+06
NGU-105	57.76	8.15237	469		0	10	5	2.2728	percent	82.1113	percent	4-8	491.939	kg/m3	11.1808	kg/m3	NGU rapport 95.054 (Porosity, DBD)	DBD calculated from weight of dry sample and volume of wet sample. Porosity calculated with grain density of 2700 kg/m3.	4.21088e+06	3.85233e+06
NGU-106	57.8206	8.02552	525		0	10	5	2.3138	percent	79.9735	percent	4-8	550.729	kg/m3	12.7428	kg/m3	NGU rapport 95.054 (Porosity, DBD)	DBD calculated from weight of dry sample and volume of wet sample. Porosity calculated with grain density of 2700 kg/m3.	4.20351e+06	3.85927e+06
NGU-107	57.8775	7.90873	518		0	10	5	2.2302	percent	81.8877	percent	4-8	498.088	kg/m3	11.1084	kg/m3	NGU rapport 95.054 (Porosity, DBD)	DBD calculated from weight of dry sample and volume of wet sample. Porosity calculated with grain density of 2700 kg/m3.	4.19676e+06	3.8658e+06
NGU-108	57.9349	7.785	324		0	10	5	2.2016	percent	80.6201	percent	4-8	532.947	kg/m3	11.7334	kg/m3	NGU rapport 95.054 (Porosity, DBD)	DBD calculated from weight of dry sample and volume of wet sample. Porosity calculated with grain density of 2700 kg/m3.	4.18962e+06	3.87239e+06
NGU-109	57.926	7.55277	329		0	10	5	2.1344	percent	81.188	percent	4-8	517.331	kg/m3	11.0419	kg/m3	NGU rapport 95.054 (Porosity, DBD)	DBD calculated from weight of dry sample and volume of wet sample. Porosity calculated with grain density of 2700 kg/m3.	4.17581e+06	3.87185e+06
NGU-110	57.8681	7.67502	504		0	10	5	2.2488	percent	81.9008	percent	4-8	497.727	kg/m3	11.1929	kg/m3	NGU rapport 95.054 (Porosity, DBD)	DBD calculated from weight of dry sample and volume of wet sample. Porosity calculated with grain density of 2700 kg/m3.	4.18284e+06	3.86518e+06
NGU-111	57.8096	7.79775	512		0	10	5	2.2536	percent	81.5744	percent	4-8	506.704	kg/m3	11.4191	kg/m3	NGU rapport 95.054 (Porosity, DBD)	DBD calculated from weight of dry sample and volume of wet sample. Porosity calculated with grain density of 2700 kg/m3.	4.18993e+06	3.85844e+06
NGU-112	57.7523	7.91782	473		0	10	5	2.257	percent	80.5319	percent	4-8	535.374	kg/m3	12.0834	kg/m3	NGU rapport 95.054 (Porosity, DBD)	DBD calculated from weight of dry sample and volume of wet sample. Porosity calculated with grain density of 2700 kg/m3.	4.19688e+06	3.85186e+06
NGU-113	57.6929	8.03995	407		0	10	5	1.5902	percent	73.0368	percent	4-8	741.487	kg/m3	11.7911	kg/m3	NGU rapport 95.054 (Porosity, DBD)	DBD calculated from weight of dry sample and volume of wet sample. Porosity calculated with grain density of 2700 kg/m3.	4.20397e+06	3.84504e+06
NGU-114	57.6155	8.20087	218		0	10	5	1.9792	percent	72.4233	percent	4-8	758.359	kg/m3	15.0094	kg/m3	NGU rapport 95.054 (Porosity, DBD)	DBD calculated from weight of dry sample and volume of wet sample. Porosity calculated with grain density of 2700 kg/m3.	4.21335e+06	3.83618e+06
NGU-115	57.5757	8.28292	168		0	10	5	0.57104	percent	50.3115	percent	4-8	1366.43	kg/m3	7.80288	kg/m3	NGU rapport 95.054 (Porosity, DBD)	DBD calculated from weight of dry sample and volume of wet sample. Porosity calculated with grain density of 2700 kg/m3.	4.21814e+06	3.83164e+06
NGU-116	57.5319	8.13568	162		0	10	5	0.74852	percent	56.1507	percent	4-8	1205.86	kg/m3	9.02607	kg/m3	NGU rapport 95.054 (Porosity, DBD)	DBD calculated from weight of dry sample and volume of wet sample. Porosity calculated with grain density of 2700 kg/m3.	4.2092e+06	3.82699e+06
NGU-117	57.5588	8.0814	188		0	10	5	1.1868	percent	65.1557	percent	4-8	958.217	kg/m3	11.3721	kg/m3	NGU rapport 95.054 (Porosity, DBD)	DBD calculated from weight of dry sample and volume of wet sample. Porosity calculated with grain density of 2700 kg/m3.	4.20602e+06	3.83007e+06
NGU-118	57.6296	7.93523	284		0	10	5	1.4516	percent	73.7716	percent	4-8	721.28	kg/m3	10.4701	kg/m3	NGU rapport 95.054 (Porosity, DBD)	DBD calculated from weight of dry sample and volume of wet sample. Porosity calculated with grain density of 2700 kg/m3.	4.1975e+06	3.83818e+06
NGU-119	57.6894	7.81258	412		0	10	5	2.231	percent	81.4637	percent	4-8	509.749	kg/m3	11.3725	kg/m3	NGU rapport 95.054 (Porosity, DBD)	DBD calculated from weight of dry sample and volume of wet sample. Porosity calculated with grain density of 2700 kg/m3.	4.19038e+06	3.84505e+06
NGU-120	57.7463	7.69312	458		0	10	5	2.2194	percent	83.8054	percent	4-8	445.353	kg/m3	9.88415	kg/m3	NGU rapport 95.054 (Porosity, DBD)	DBD calculated from weight of dry sample and volume of wet sample. Porosity calculated with grain density of 2700 kg/m3.	4.18346e+06	3.8516e+06
NGU-121	57.8052	7.57077	477		0	10	5	2.2384	percent	81.6205	percent	4-8	505.435	kg/m3	11.3137	kg/m3	NGU rapport 95.054 (Porosity, DBD)	DBD calculated from weight of dry sample and volume of wet sample. Porosity calculated with grain density of 2700 kg/m3.	4.1764e+06	3.85839e+06
NGU-122	57.8628	7.45063	497		0	10	5	2.2816	percent	82.5173	percent	4-8	480.775	kg/m3	10.9694	kg/m3	NGU rapport 95.054 (Porosity, DBD)	DBD calculated from weight of dry sample and volume of wet sample. Porosity calculated with grain density of 2700 kg/m3.	4.1695e+06	3.86504e+06
NGU-123	57.9205	7.32842	276		0	10	5	2.01	percent	81.8182	percent	4-8	500	kg/m3	10.05	kg/m3	NGU rapport 95.054 (Porosity, DBD)	DBD calculated from weight of dry sample and volume of wet sample. Porosity calculated with grain density of 2700 kg/m3.	4.16249e+06	3.87172e+06
NGU-127	57.8556	7.21658	457		0	10	5	1.8368	percent	77.6725	percent	4-8	614.006	kg/m3	11.2781	kg/m3	NGU rapport 95.054 (Porosity, DBD)	DBD calculated from weight of dry sample and volume of wet sample. Porosity calculated with grain density of 2700 kg/m3.	4.15556e+06	3.86476e+06
NGU-128	57.7972	7.34093	440		0	10	5	2.1908	percent	80.9924	percent	4-8	522.709	kg/m3	11.4515	kg/m3	NGU rapport 95.054 (Porosity, DBD)	DBD calculated from weight of dry sample and volume of wet sample. Porosity calculated with grain density of 2700 kg/m3.	4.1627e+06	3.85799e+06
NGU-129	57.7397	7.46178	411		0	10	5	2.219	percent	80.0211	percent	4-8	549.421	kg/m3	12.1916	kg/m3	NGU rapport 95.054 (Porosity, DBD)	DBD calculated from weight of dry sample and volume of wet sample. Porosity calculated with grain density of 2700 kg/m3.	4.16965e+06	3.85133e+06
NGU-130	57.6806	7.58355	385		0	10	5	2.238	percent	80.2597	percent	4-8	542.859	kg/m3	12.1492	kg/m3	NGU rapport 95.054 (Porosity, DBD)	DBD calculated from weight of dry sample and volume of wet sample. Porosity calculated with grain density of 2700 kg/m3.	4.17668e+06	3.84452e+06
NGU-131	57.624	7.70247	327		0	10	5	1.6842	percent	72.9045	percent	4-8	745.125	kg/m3	12.5494	kg/m3	NGU rapport 95.054 (Porosity, DBD)	DBD calculated from weight of dry sample and volume of wet sample. Porosity calculated with grain density of 2700 kg/m3.	4.18357e+06	3.83799e+06
NGU-132	57.5632	7.82847	221		0	10	5	2.929	percent	81.4157	percent	4-8	511.069	kg/m3	14.9692	kg/m3	NGU rapport 95.054 (Porosity, DBD)	DBD calculated from weight of dry sample and volume of wet sample. Porosity calculated with grain density of 2700 kg/m3.	4.19089e+06	3.83099e+06
NGU-133	57.5006	7.95742	168		0	10	5	0.93262	percent	45.2799	percent	4-8	1504.8	kg/m3	14.0341	kg/m3	NGU rapport 95.054 (Porosity, DBD)	DBD calculated from weight of dry sample and volume of wet sample. Porosity calculated with grain density of 2700 kg/m3.	4.1984e+06	3.8238e+06
NGU-135	57.4959	7.7145	185.5		0	2	1	1.019	percent	56	percent	4-8	1210	kg/m3	12.3299	kg/m3	NGU rapport 97.065 (Porosity, DBD)	DBD measured or calculated from wet bulk density and water content. Porosity calculated with grain density of 2750 kg/m3.	4.18381e+06	3.82372e+06
NGU-136	57.5572	7.59717	249		0	10	5	2.4726	percent	82	percent	4-8	495	kg/m3	12.2394	kg/m3	NGU rapport 97.065 (Porosity, DBD)	DBD measured or calculated from wet bulk density and water content. Porosity calculated with grain density of 2750 kg/m3.	4.17701e+06	3.83076e+06
NGU-137	57.6162	7.47533	314		0	2	1	1.964	percent	82	percent	4-8	495	kg/m3	9.7218	kg/m3	NGU rapport 97.065 (Porosity, DBD)	DBD measured or calculated from wet bulk density and water content. Porosity calculated with grain density of 2750 kg/m3.	4.16995e+06	3.83757e+06
NGU-138	57.6725	7.35633	320		0	10	5	1.994	percent	81	percent	4-8	522.5	kg/m3	10.4186	kg/m3	NGU rapport 97.065 (Porosity, DBD)	DBD measured or calculated from wet bulk density and water content. Porosity calculated with grain density of 2750 kg/m3.	4.16308e+06	3.84409e+06
NGU-139	57.7318	7.2075	363		0	2	1	2.09	percent	80	percent	4-8	550	kg/m3	11.495	kg/m3	NGU rapport 97.065 (Porosity, DBD)	DBD measured or calculated from wet bulk density and water content. Porosity calculated with grain density of 2750 kg/m3.	4.15446e+06	3.85102e+06
NGU-140	57.7876	7.10967	402		0	10	5	2.1162	percent	82	percent	4-8	495	kg/m3	10.4752	kg/m3	NGU rapport 97.065 (Porosity, DBD)	DBD measured or calculated from wet bulk density and water content. Porosity calculated with grain density of 2750 kg/m3.	4.14889e+06	3.85745e+06
NGU-141	57.8457	6.99	419		0	2	1	2.215	percent	81	percent	4-8	522.5	kg/m3	11.5734	kg/m3	NGU rapport 97.065 (Porosity, DBD)	DBD measured or calculated from wet bulk density and water content. Porosity calculated with grain density of 2750 kg/m3.	4.14205e+06	3.8642e+06
NGU-142	57.9038	6.86483	400		0	10	4	2.189	percent	83	percent	4-8	467.5	kg/m3	10.2336	kg/m3	NGU rapport 97.065 (Porosity, DBD)	DBD measured or calculated from wet bulk density and water content. Porosity calculated with grain density of 2750 kg/m3.	4.13491e+06	3.87098e+06
NGU-143	57.9443	6.77617	396		0	10	5	2.2368	percent	79	percent	4-8	577.5	kg/m3	12.9175	kg/m3	NGU rapport 97.065 (Porosity, DBD)	DBD measured or calculated from wet bulk density and water content. Porosity calculated with grain density of 2750 kg/m3.	4.12987e+06	3.87572e+06
NGU-144	58.0214	6.61667	384		0	2	1	1.295	percent	72	percent	4-8	770	kg/m3	9.9715	kg/m3	NGU rapport 97.065 (Porosity, DBD)	DBD measured or calculated from wet bulk density and water content. Porosity calculated with grain density of 2750 kg/m3.	4.12084e+06	3.88472e+06
NGU-145	58.0833	6.4769	368		0	10	5	2.0878	percent	83	percent	4-8	467.5	kg/m3	9.76046	kg/m3	NGU rapport 97.065 (Porosity, DBD)	DBD measured or calculated from wet bulk density and water content. Porosity calculated with grain density of 2750 kg/m3.	4.11293e+06	3.892e+06
NGU-146	57.985	6.31333	333		0	10	5	1.9551	percent	79	percent	4-8	577.5	kg/m3	11.2907	kg/m3	NGU rapport 97.065 (Porosity, DBD)	DBD measured or calculated from wet bulk density and water content. Porosity calculated with grain density of 2750 kg/m3.	4.1027e+06	3.88156e+06
NGU-147	57.9217	6.45017	336		0	10	5	2.0722	percent	81	percent	4-8	522.5	kg/m3	10.8272	kg/m3	NGU rapport 97.065 (Porosity, DBD)	DBD measured or calculated from wet bulk density and water content. Porosity calculated with grain density of 2750 kg/m3.	4.11043e+06	3.87412e+06
NGU-148	57.8433	6.60583	341		0	10	5	2.0172	percent	82	percent	4-8	495	kg/m3	9.98514	kg/m3	NGU rapport 97.065 (Porosity, DBD)	DBD measured or calculated from wet bulk density and water content. Porosity calculated with grain density of 2750 kg/m3.	4.11922e+06	3.86497e+06
NGU-149	57.7981	6.70428	340		0	2	1	1.956	percent	80	percent	4-8	550	kg/m3	10.758	kg/m3	NGU rapport 97.065 (Porosity, DBD)	DBD measured or calculated from wet bulk density and water content. Porosity calculated with grain density of 2750 kg/m3.	4.12483e+06	3.85967e+06
NGU-150	57.7447	6.82083	333		0	10	5	2.0268	percent	78	percent	4-8	605	kg/m3	12.2621	kg/m3	NGU rapport 97.065 (Porosity, DBD)	DBD measured or calculated from wet bulk density and water content. Porosity calculated with grain density of 2750 kg/m3.	4.13148e+06	3.85341e+06
NGU-151	57.6861	6.9455	314		0	2	1	2.099	percent	79	percent	4-8	577.5	kg/m3	12.1217	kg/m3	NGU rapport 97.065 (Porosity, DBD)	DBD measured or calculated from wet bulk density and water content. Porosity calculated with grain density of 2750 kg/m3.	4.13862e+06	3.84658e+06
NGU-152	57.638	7.04733	291		0	10	5	2.154	percent	81	percent	4-8	522.5	kg/m3	11.2546	kg/m3	NGU rapport 97.065 (Porosity, DBD)	DBD measured or calculated from wet bulk density and water content. Porosity calculated with grain density of 2750 kg/m3.	4.14447e+06	3.84098e+06
NGU-153	57.5688	7.195	268		0	2	1	2.303	percent	81	percent	4-8	522.5	kg/m3	12.0332	kg/m3	NGU rapport 97.065 (Porosity, DBD)	DBD measured or calculated from wet bulk density and water content. Porosity calculated with grain density of 2750 kg/m3.	4.15298e+06	3.83294e+06
NGU-154	57.5133	7.31017	223		0	10	5	1.8891	percent	74	percent	4-8	715	kg/m3	13.5071	kg/m3	NGU rapport 97.065 (Porosity, DBD)	DBD measured or calculated from wet bulk density and water content. Porosity calculated with grain density of 2750 kg/m3.	4.15963e+06	3.8265e+06
NGU-155	57.4545	7.43267	140		0	2	1	0.4502	percent	40	percent	4-8	1650	kg/m3	7.4283	kg/m3	NGU rapport 97.065 (Porosity, DBD)	DBD measured or calculated from wet bulk density and water content. Porosity calculated with grain density of 2750 kg/m3.	4.16673e+06	3.81969e+06
NGU-156	57.3947	7.5555	102		0	10	5	0.228	percent	42	percent	4-8	1595	kg/m3	3.6366	kg/m3	NGU rapport 97.065 (Porosity, DBD)	DBD measured or calculated from wet bulk density and water content. Porosity calculated with grain density of 2750 kg/m3.	4.17387e+06	3.81279e+06
NGU-158	57.4047	7.14523	121		0	10	5	0.28824	percent	42	percent	4-8	1595	kg/m3	4.59743	kg/m3	NGU rapport 97.065 (Porosity, DBD)	DBD measured or calculated from wet bulk density and water content. Porosity calculated with grain density of 2750 kg/m3.	4.14924e+06	3.81481e+06
NGU-160	57.5339	6.877	190		0	2	1	1.711	percent	74	percent	4-8	715	kg/m3	12.2337	kg/m3	NGU rapport 97.065 (Porosity, DBD)	DBD measured or calculated from wet bulk density and water content. Porosity calculated with grain density of 2750 kg/m3.	4.13377e+06	3.82984e+06
NGU-161	57.5808	6.78267	201		0	10	5	1.2933	percent	70	percent	4-8	825	kg/m3	10.6697	kg/m3	NGU rapport 97.065 (Porosity, DBD)	DBD measured or calculated from wet bulk density and water content. Porosity calculated with grain density of 2750 kg/m3.	4.12836e+06	3.83531e+06
NGU-162	57.6409	6.65788	283		0	2	1	1.83	percent	65	percent	4-8	962.5	kg/m3	17.6137	kg/m3	NGU rapport 97.065 (Porosity, DBD)	DBD measured or calculated from wet bulk density and water content. Porosity calculated with grain density of 2750 kg/m3.	4.12122e+06	3.84233e+06
NGU-163	57.6975	6.54648	309		0	10	5	2.1671	percent	80	percent	4-8	550	kg/m3	11.9191	kg/m3	NGU rapport 97.065 (Porosity, DBD)	DBD measured or calculated from wet bulk density and water content. Porosity calculated with grain density of 2750 kg/m3.	4.11488e+06	3.84893e+06
NGU-164	57.745	6.4415	293		0	2	1	2.025	percent	77	percent	4-8	632.5	kg/m3	12.8081	kg/m3	NGU rapport 97.065 (Porosity, DBD)	DBD measured or calculated from wet bulk density and water content. Porosity calculated with grain density of 2750 kg/m3.	4.10889e+06	3.85452e+06
NGU-165	57.8175	6.28738	289		0	10	5	2.0749	percent	77	percent	4-8	632.5	kg/m3	13.1237	kg/m3	NGU rapport 97.065 (Porosity, DBD)	DBD measured or calculated from wet bulk density and water content. Porosity calculated with grain density of 2750 kg/m3.	4.10015e+06	3.86304e+06
NGU-166	57.8846	6.1455	285		0	10	5	1.9096	percent	78	percent	4-8	605	kg/m3	11.5531	kg/m3	NGU rapport 97.065 (Porosity, DBD)	DBD measured or calculated from wet bulk density and water content. Porosity calculated with grain density of 2750 kg/m3.	4.09214e+06	3.87093e+06
NGU-167	57.7226	5.90643	148		0	10	5	0.7	percent	59	percent	4-8	1127.5	kg/m3	7.8925	kg/m3	NGU rapport 97.065 (Porosity, DBD)	DBD measured or calculated from wet bulk density and water content. Porosity calculated with grain density of 2750 kg/m3.	4.07689e+06	3.85374e+06
NGU-169	57.7156	6.12462	223		0	10	5	1.4811	percent	66	percent	4-8	935	kg/m3	13.8483	kg/m3	NGU rapport 97.065 (Porosity, DBD)	DBD measured or calculated from wet bulk density and water content. Porosity calculated with grain density of 2750 kg/m3.	4.08984e+06	3.85224e+06
NGU-170	57.6401	6.28225	0		0	10	5	0.88178	percent	58	percent	4-8	1155	kg/m3	10.1846	kg/m3	NGU rapport 97.065 (Porosity, DBD)	DBD measured or calculated from wet bulk density and water content. Porosity calculated with grain density of 2750 kg/m3.	4.09878e+06	3.84334e+06
NGU-171	57.5906	6.37587	153		0	2	1	1.1395	percent	57	percent	4-8	1182.5	kg/m3	13.4746	kg/m3	NGU rapport 97.065 (Porosity, DBD)	DBD measured or calculated from wet bulk density and water content. Porosity calculated with grain density of 2750 kg/m3.	4.10408e+06	3.83756e+06
NGU-172	57.5337	6.48628	144		0	10	5	0.39666	percent	46	percent	4-8	1485	kg/m3	5.8904	kg/m3	NGU rapport 97.065 (Porosity, DBD)	DBD measured or calculated from wet bulk density and water content. Porosity calculated with grain density of 2750 kg/m3.	4.11036e+06	3.83091e+06
NGU-173	57.7351	5.70955	136		0	10	5	0.71535	percent	51	percent	4-8	1347.5	kg/m3	9.63934	kg/m3	NGU rapport 97.065 (Porosity, DBD)	DBD measured or calculated from wet bulk density and water content. Porosity calculated with grain density of 2750 kg/m3.	4.06525e+06	3.85581e+06
NGU-175	57.8441	5.87502	224		0	10	5	2.1496	percent	75	percent	4-8	687.5	kg/m3	14.7785	kg/m3	NGU rapport 97.065 (Porosity, DBD)	DBD measured or calculated from wet bulk density and water content. Porosity calculated with grain density of 2750 kg/m3.	4.07583e+06	3.86734e+06
NGU-176	57.9425	6.013	290		0	2	1	1.964	percent	77	percent	4-8	632.5	kg/m3	12.4223	kg/m3	NGU rapport 97.065 (Porosity, DBD)	DBD measured or calculated from wet bulk density and water content. Porosity calculated with grain density of 2750 kg/m3.	4.08466e+06	3.8778e+06
NGU-177	58.0412	6.18205	340		0	2	1	1.696	percent	75	percent	4-8	687.5	kg/m3	11.66	kg/m3	NGU rapport 97.065 (Porosity, DBD)	DBD measured or calculated from wet bulk density and water content. Porosity calculated with grain density of 2750 kg/m3.	4.09528e+06	3.88822e+06
NGU-178	58.1433	6.35095	330		0	10	5	1.986	percent	75	percent	4-8	687.5	kg/m3	13.6538	kg/m3	NGU rapport 97.065 (Porosity, DBD)	DBD measured or calculated from wet bulk density and water content. Porosity calculated with grain density of 2750 kg/m3.	4.10586e+06	3.89903e+06
NGU-179	58.2056	6.21508	315		0	10	5	1.9306	percent	78	percent	4-8	605	kg/m3	11.6801	kg/m3	NGU rapport 97.065 (Porosity, DBD)	DBD measured or calculated from wet bulk density and water content. Porosity calculated with grain density of 2750 kg/m3.	4.09824e+06	3.90637e+06
NGU-180	58.1019	6.04985	341		0	2	1	1.224	percent	71	percent	4-8	797.5	kg/m3	9.7614	kg/m3	NGU rapport 97.065 (Porosity, DBD)	DBD measured or calculated from wet bulk density and water content. Porosity calculated with grain density of 2750 kg/m3.	4.08786e+06	3.89538e+06
NGU-181	58.0038	5.89517	296		0	10	10	1.93545	percent	82	percent	4-8	495	kg/m3	9.58048	kg/m3	NGU rapport 97.065 (Porosity, DBD)	DBD measured or calculated from wet bulk density and water content. Porosity calculated with grain density of 2750 kg/m3.	4.07809e+06	3.885e+06
NGU-182	57.9088	5.74802	248		0	10	10	1.8605	percent	77	percent	4-8	632.5	kg/m3	11.7677	kg/m3	NGU rapport 97.065 (Porosity, DBD)	DBD measured or calculated from wet bulk density and water content. Porosity calculated with grain density of 2750 kg/m3.	4.06874e+06	3.87496e+06
NGU-183	57.9709	5.62203	238		0	1	1	1.907	percent	77	percent	4-8	632.5	kg/m3	12.0618	kg/m3	NGU rapport 97.065 (Porosity, DBD)	DBD measured or calculated from wet bulk density and water content. Porosity calculated with grain density of 2750 kg/m3.	4.06172e+06	3.88231e+06
NGU-184	58.0639	5.76587	299		0	1	1	1.896	percent	80	percent	4-8	550	kg/m3	10.428	kg/m3	NGU rapport 97.065 (Porosity, DBD)	DBD measured or calculated from wet bulk density and water content. Porosity calculated with grain density of 2750 kg/m3.	4.07086e+06	3.89212e+06
NGU-185	58.1613	5.9178	339		0	1	1	1.507	percent	77	percent	4-8	632.5	kg/m3	9.53177	kg/m3	NGU rapport 97.065 (Porosity, DBD)	DBD measured or calculated from wet bulk density and water content. Porosity calculated with grain density of 2750 kg/m3.	4.08047e+06	3.90241e+06
NGU-186	58.264	6.07977	244		0	1	1	1.091	percent	53	percent	4-8	1292.5	kg/m3	14.1012	kg/m3	NGU rapport 97.065 (Porosity, DBD)	DBD measured or calculated from wet bulk density and water content. Porosity calculated with grain density of 2750 kg/m3.	4.09066e+06	3.91328e+06
NGU-188	58.2209	5.78778	336		0	10	10	1.81915	percent	85	percent	4-8	412.5	kg/m3	7.50399	kg/m3	NGU rapport 97.065 (Porosity, DBD)	DBD measured or calculated from wet bulk density and water content. Porosity calculated with grain density of 2750 kg/m3.	4.07323e+06	3.90947e+06
NGU-189	58.1241	5.63672	302		0	1	1	1.944	percent	83	percent	4-8	467.5	kg/m3	9.0882	kg/m3	NGU rapport 97.065 (Porosity, DBD)	DBD measured or calculated from wet bulk density and water content. Porosity calculated with grain density of 2750 kg/m3.	4.06367e+06	3.89927e+06
NGU-190	58.0337	5.49703	262		0	10	10	2.0203	percent	78	percent	4-8	605	kg/m3	12.2228	kg/m3	NGU rapport 97.065 (Porosity, DBD)	DBD measured or calculated from wet bulk density and water content. Porosity calculated with grain density of 2750 kg/m3.	4.05478e+06	3.88974e+06
NGU-191	57.9832	5.20655	146		0	10	10	0.4552	percent	44	percent	4-8	1540	kg/m3	7.01008	kg/m3	NGU rapport 97.065 (Porosity, DBD)	DBD measured or calculated from wet bulk density and water content. Porosity calculated with grain density of 2750 kg/m3.	4.03725e+06	3.88526e+06
NGU-192	58.0323	5.28112	207		0	1	1	0.6095	percent	55	percent	4-8	1237.5	kg/m3	7.54256	kg/m3	NGU rapport 97.065 (Porosity, DBD)	DBD measured or calculated from wet bulk density and water content. Porosity calculated with grain density of 2750 kg/m3.	4.04203e+06	3.89041e+06
NGU-193	58.0931	5.37492	288		0	1	1	2.071	percent	79	percent	4-8	577.5	kg/m3	11.96	kg/m3	NGU rapport 97.065 (Porosity, DBD)	DBD measured or calculated from wet bulk density and water content. Porosity calculated with grain density of 2750 kg/m3.	4.04802e+06	3.8968e+06
NGU-194	58.181	5.50818	308		0	10	10	2.01575	percent	81	percent	4-8	522.5	kg/m3	10.5323	kg/m3	NGU rapport 97.065 (Porosity, DBD)	DBD measured or calculated from wet bulk density and water content. Porosity calculated with grain density of 2750 kg/m3.	4.05652e+06	3.90605e+06
NGU-195	58.2732	5.65588	336		0	1	1	1.844	percent	81	percent	4-8	522.5	kg/m3	9.6349	kg/m3	NGU rapport 97.065 (Porosity, DBD)	DBD measured or calculated from wet bulk density and water content. Porosity calculated with grain density of 2750 kg/m3.	4.06585e+06	3.91575e+06
NGU-196	58.3816	5.81857	218		0	1	1	0.7834	percent	57	percent	4-8	1182.5	kg/m3	9.2637	kg/m3	NGU rapport 97.065 (Porosity, DBD)	DBD measured or calculated from wet bulk density and water content. Porosity calculated with grain density of 2750 kg/m3.	4.07613e+06	3.92721e+06
NGU-197	58.4718	5.61822	306		0	1	1	1.634	percent	79	percent	4-8	577.5	kg/m3	9.43635	kg/m3	NGU rapport 97.065 (Porosity, DBD)	DBD measured or calculated from wet bulk density and water content. Porosity calculated with grain density of 2750 kg/m3.	4.06506e+06	3.93793e+06
NGU-198	58.3663	5.45052	335		0	10	10	1.8333	percent	82	percent	4-8	495	kg/m3	9.07484	kg/m3	NGU rapport 97.065 (Porosity, DBD)	DBD measured or calculated from wet bulk density and water content. Porosity calculated with grain density of 2750 kg/m3.	4.0545e+06	3.92683e+06
NGU-199	58.2751	5.30633	322		0	1	1	1.872	percent	82	percent	4-8	495	kg/m3	9.2664	kg/m3	NGU rapport 97.065 (Porosity, DBD)	DBD measured or calculated from wet bulk density and water content. Porosity calculated with grain density of 2750 kg/m3.	4.04537e+06	3.91726e+06
NGU-200	58.1926	5.17715	309		0	10	10	2.0951	percent	83	percent	4-8	467.5	kg/m3	9.79459	kg/m3	NGU rapport 97.065 (Porosity, DBD)	DBD measured or calculated from wet bulk density and water content. Porosity calculated with grain density of 2750 kg/m3.	4.03715e+06	3.90861e+06
NGU-201	58.085	5.00855	197		0	1	1	0.3404	percent	42	percent	4-8	1595	kg/m3	5.42938	kg/m3	NGU rapport 97.065 (Porosity, DBD)	DBD measured or calculated from wet bulk density and water content. Porosity calculated with grain density of 2750 kg/m3.	4.02637e+06	3.89735e+06
NGU-203	57.8681	4.67133	102		0	7	7	0.304921	percent	42	percent	4-8	1595	kg/m3	4.8635	kg/m3	NGU rapport 97.065 (Porosity, DBD)	DBD measured or calculated from wet bulk density and water content. Porosity calculated with grain density of 2750 kg/m3.	4.00464e+06	3.87473e+06
NGU-205	58.039	4.71732	0		0	1	1	0.3293	percent	40	percent	4-8	1650	kg/m3	5.43345	kg/m3	NGU rapport 97.065 (Porosity, DBD)	DBD measured or calculated from wet bulk density and water content. Porosity calculated with grain density of 2750 kg/m3.	4.00882e+06	3.89348e+06
NGU-206	58.1432	4.87523	0		0	10	10	0.904485	percent	55	percent	4-8	1237.5	kg/m3	11.193	kg/m3	NGU rapport 97.065 (Porosity, DBD)	DBD measured or calculated from wet bulk density and water content. Porosity calculated with grain density of 2750 kg/m3.	4.019e+06	3.90437e+06
NGU-207	58.2515	5.04048	0		0	1	1	1.9	percent	79	percent	4-8	577.5	kg/m3	10.9725	kg/m3	NGU rapport 97.065 (Porosity, DBD)	DBD measured or calculated from wet bulk density and water content. Porosity calculated with grain density of 2750 kg/m3.	4.02959e+06	3.9157e+06
NGU-208	58.3356	5.17067	0		0	10	10	1.87685	percent	82	percent	4-8	495	kg/m3	9.29041	kg/m3	NGU rapport 97.065 (Porosity, DBD)	DBD measured or calculated from wet bulk density and water content. Porosity calculated with grain density of 2750 kg/m3.	4.03789e+06	3.9245e+06
NGU-209	58.4272	5.31207	0		0	1	1	1.7195	percent	78	percent	4-8	605	kg/m3	10.403	kg/m3	NGU rapport 97.065 (Porosity, DBD)	DBD measured or calculated from wet bulk density and water content. Porosity calculated with grain density of 2750 kg/m3.	4.04686e+06	3.93412e+06
NGU-210	58.5344	5.47852	0		0	1	1	1.678	percent	83	percent	4-8	467.5	kg/m3	7.84465	kg/m3	NGU rapport 97.065 (Porosity, DBD)	DBD measured or calculated from wet bulk density and water content. Porosity calculated with grain density of 2750 kg/m3.	4.05737e+06	3.94538e+06
NGU-211	58.5862	5.36017	0		0	1	1	1.454	percent	79	percent	4-8	577.5	kg/m3	8.39685	kg/m3	NGU rapport 97.065 (Porosity, DBD)	DBD measured or calculated from wet bulk density and water content. Porosity calculated with grain density of 2750 kg/m3.	4.05088e+06	3.95158e+06
NGU-212	58.4803	5.19303	0		0	10	10	1.6036	percent	81	percent	4-8	522.5	kg/m3	8.37881	kg/m3	NGU rapport 97.065 (Porosity, DBD)	DBD measured or calculated from wet bulk density and water content. Porosity calculated with grain density of 2750 kg/m3.	4.04033e+06	3.94048e+06
NGU-213	58.3895	5.04925	308		0	1	1	1.682	percent	80	percent	4-8	550	kg/m3	9.251	kg/m3	NGU rapport 97.065 (Porosity, DBD)	DBD measured or calculated from wet bulk density and water content. Porosity calculated with grain density of 2750 kg/m3.	4.03122e+06	3.93097e+06
NGU-214	58.3048	4.91648	302		0	10	10	1.7075	percent	81	percent	4-8	522.5	kg/m3	8.92169	kg/m3	NGU rapport 97.065 (Porosity, DBD)	DBD measured or calculated from wet bulk density and water content. Porosity calculated with grain density of 2750 kg/m3.	4.02276e+06	3.92212e+06
NGU-215	58.1968	4.75102	268		0	1	1	1.645	percent	69	percent	4-8	852.5	kg/m3	14.0236	kg/m3	NGU rapport 97.065 (Porosity, DBD)	DBD measured or calculated from wet bulk density and water content. Porosity calculated with grain density of 2750 kg/m3.	4.01216e+06	3.91085e+06
NGU-216	58.0936	4.5924	126		0	3	3	0.288283	percent	42	percent	4-8	1595	kg/m3	4.59812	kg/m3	NGU rapport 97.065 (Porosity, DBD)	DBD measured or calculated from wet bulk density and water content. Porosity calculated with grain density of 2750 kg/m3.	4.00194e+06	3.9001e+06
NGU-220	58.2556	4.61423	290		0	10	10	1.63295	percent	78	percent	4-8	605	kg/m3	9.87935	kg/m3	NGU rapport 97.065 (Porosity, DBD)	DBD measured or calculated from wet bulk density and water content. Porosity calculated with grain density of 2750 kg/m3.	4.00464e+06	3.91796e+06
NGU-221	58.3638	4.78027	292		0	1	1	1.549	percent	75	percent	4-8	687.5	kg/m3	10.6494	kg/m3	NGU rapport 97.065 (Porosity, DBD)	DBD measured or calculated from wet bulk density and water content. Porosity calculated with grain density of 2750 kg/m3.	4.01529e+06	3.92925e+06
NGU-222	58.45	4.91252	290		0	1	1	1.539	percent	81	percent	4-8	522.5	kg/m3	8.04128	kg/m3	NGU rapport 97.065 (Porosity, DBD)	DBD measured or calculated from wet bulk density and water content. Porosity calculated with grain density of 2750 kg/m3.	4.02373e+06	3.93825e+06
NGU-223	58.5414	5.05418	278		0	1	1	1.411	percent	77	percent	4-8	632.5	kg/m3	8.92458	kg/m3	NGU rapport 97.065 (Porosity, DBD)	DBD measured or calculated from wet bulk density and water content. Porosity calculated with grain density of 2750 kg/m3.	4.03273e+06	3.9478e+06
NGU-224	58.6482	5.22062	241		0	1	1	1.541	percent	79	percent	4-8	577.5	kg/m3	8.89927	kg/m3	NGU rapport 97.065 (Porosity, DBD)	DBD measured or calculated from wet bulk density and water content. Porosity calculated with grain density of 2750 kg/m3.	4.04325e+06	3.95899e+06
NGU-225	58.7501	5.3788	155		0	1	1	0.2989	percent	41	percent	4-8	1622.5	kg/m3	4.84965	kg/m3	NGU rapport 97.065 (Porosity, DBD)	DBD measured or calculated from wet bulk density and water content. Porosity calculated with grain density of 2750 kg/m3.	4.05319e+06	3.96969e+06
NGU-226	58.8103	5.24598	198		0	1	1	0.8378	percent	48	percent	4-8	1430	kg/m3	11.9805	kg/m3	NGU rapport 97.065 (Porosity, DBD)	DBD measured or calculated from wet bulk density and water content. Porosity calculated with grain density of 2750 kg/m3.	4.04598e+06	3.97688e+06
NGU-227	58.7073	5.08393	228		0	1	1	1.02	percent	64	percent	4-8	990	kg/m3	10.098	kg/m3	NGU rapport 97.065 (Porosity, DBD)	DBD measured or calculated from wet bulk density and water content. Porosity calculated with grain density of 2750 kg/m3.	4.03579e+06	3.9661e+06
NGU-228	58.6007	4.91725	259		0	1	1	1.527	percent	78	percent	4-8	605	kg/m3	9.23835	kg/m3	NGU rapport 97.065 (Porosity, DBD)	DBD measured or calculated from wet bulk density and water content. Porosity calculated with grain density of 2750 kg/m3.	4.02526e+06	3.95495e+06
NGU-229	58.5102	4.77543	279		0	1	1	1.514	percent	78	percent	4-8	605	kg/m3	9.1597	kg/m3	NGU rapport 97.065 (Porosity, DBD)	DBD measured or calculated from wet bulk density and water content. Porosity calculated with grain density of 2750 kg/m3.	4.01625e+06	3.94551e+06
NGU-230	58.4231	4.64212	286		0	10	10	1.2719	percent	71	percent	4-8	797.5	kg/m3	10.1434	kg/m3	NGU rapport 97.065 (Porosity, DBD)	DBD measured or calculated from wet bulk density and water content. Porosity calculated with grain density of 2750 kg/m3.	4.00773e+06	3.93642e+06
NGU-231	58.3145	4.47553	303		0	1	1	1.719	percent	76	percent	4-8	660	kg/m3	11.3454	kg/m3	NGU rapport 97.065 (Porosity, DBD)	DBD measured or calculated from wet bulk density and water content. Porosity calculated with grain density of 2750 kg/m3.	3.99704e+06	3.92512e+06
NGU-232	58.2119	4.31973	132		0	9	9	0.282028	percent	41	percent	4-8	1622.5	kg/m3	4.5759	kg/m3	NGU rapport 97.065 (Porosity, DBD)	DBD measured or calculated from wet bulk density and water content. Porosity calculated with grain density of 2750 kg/m3.	3.98698e+06	3.91446e+06
NGU-235	58.2646	4.19427	136		0	10	10	0.325005	percent	46	percent	4-8	1485	kg/m3	4.82632	kg/m3	NGU rapport 97.065 (Porosity, DBD)	DBD measured or calculated from wet bulk density and water content. Porosity calculated with grain density of 2750 kg/m3.	3.98012e+06	3.9209e+06
NGU-236	58.3683	4.34977	303		0	10	10	1.8818	percent	75	percent	4-8	687.5	kg/m3	12.9374	kg/m3	NGU rapport 97.065 (Porosity, DBD)	DBD measured or calculated from wet bulk density and water content. Porosity calculated with grain density of 2750 kg/m3.	3.99018e+06	3.93167e+06
NGU-237	58.477	4.51537	285		0	1	1	1.487	percent	78	percent	4-8	605	kg/m3	8.99635	kg/m3	NGU rapport 97.065 (Porosity, DBD)	DBD measured or calculated from wet bulk density and water content. Porosity calculated with grain density of 2750 kg/m3.	4.00082e+06	3.94297e+06
NGU-238	58.5659	4.64827	273		0	1	1	1.531	percent	76	percent	4-8	660	kg/m3	10.1046	kg/m3	NGU rapport 97.065 (Porosity, DBD)	DBD measured or calculated from wet bulk density and water content. Porosity calculated with grain density of 2750 kg/m3.	4.00934e+06	3.95223e+06
NGU-239	58.6568	4.78827	222		0	1	1	0.9589	percent	54	percent	4-8	1265	kg/m3	12.1301	kg/m3	NGU rapport 97.065 (Porosity, DBD)	DBD measured or calculated from wet bulk density and water content. Porosity calculated with grain density of 2750 kg/m3.	4.01825e+06	3.96171e+06
NGU-240	58.7638	4.95335	201		0	1	1	2.055	percent	59	percent	4-8	1127.5	kg/m3	23.1701	kg/m3	NGU rapport 97.065 (Porosity, DBD)	DBD measured or calculated from wet bulk density and water content. Porosity calculated with grain density of 2750 kg/m3.	4.0287e+06	3.97289e+06
NGU-241	58.8679	5.1146	207		0	1	1	0.7471	percent	49	percent	4-8	1402.5	kg/m3	10.4781	kg/m3	NGU rapport 97.065 (Porosity, DBD)	DBD measured or calculated from wet bulk density and water content. Porosity calculated with grain density of 2750 kg/m3.	4.03885e+06	3.98378e+06
NGU-242	58.9246	4.9821	238		0	1	1	1.245	percent	70	percent	4-8	825	kg/m3	10.2713	kg/m3	NGU rapport 97.065 (Porosity, DBD)	DBD measured or calculated from wet bulk density and water content. Porosity calculated with grain density of 2750 kg/m3.	4.03168e+06	3.9906e+06
NGU-243	58.8215	4.8206	221		0	1	1	1.102	percent	64	percent	4-8	990	kg/m3	10.9098	kg/m3	NGU rapport 97.065 (Porosity, DBD)	DBD measured or calculated from wet bulk density and water content. Porosity calculated with grain density of 2750 kg/m3.	4.02151e+06	3.97984e+06
NGU-244	58.7149	4.65502	245		0	1	1	1.163	percent	63	percent	4-8	1017.5	kg/m3	11.8335	kg/m3	NGU rapport 97.065 (Porosity, DBD)	DBD measured or calculated from wet bulk density and water content. Porosity calculated with grain density of 2750 kg/m3.	4.01103e+06	3.96873e+06
NGU-245	58.624	4.5152	268		0	1	1	1.372	percent	73	percent	4-8	742.5	kg/m3	10.1871	kg/m3	NGU rapport 97.065 (Porosity, DBD)	DBD measured or calculated from wet bulk density and water content. Porosity calculated with grain density of 2750 kg/m3.	4.00213e+06	3.95926e+06
NGU-246	58.5342	4.37842	286		0	10	10	1.40525	percent	75	percent	4-8	687.5	kg/m3	9.66109	kg/m3	NGU rapport 97.065 (Porosity, DBD)	DBD measured or calculated from wet bulk density and water content. Porosity calculated with grain density of 2750 kg/m3.	3.99337e+06	3.94993e+06
NGU-247	58.4258	4.21408	292		0	10	10	1.98355	percent	77	percent	4-8	632.5	kg/m3	12.546	kg/m3	NGU rapport 97.065 (Porosity, DBD)	DBD measured or calculated from wet bulk density and water content. Porosity calculated with grain density of 2750 kg/m3.	3.98279e+06	3.93868e+06
NGU-251	58.3788	3.92565	150		0	5	5	0.32828	percent	36	percent	4-8	1760	kg/m3	5.77773	kg/m3	NGU rapport 97.065 (Porosity, DBD)	DBD measured or calculated from wet bulk density and water content. Porosity calculated with grain density of 2750 kg/m3.	3.96552e+06	3.93487e+06
NGU-252	58.4817	4.08087	280		0	10	10	1.32925	percent	66	percent	4-8	935	kg/m3	12.4285	kg/m3	NGU rapport 97.065 (Porosity, DBD)	DBD measured or calculated from wet bulk density and water content. Porosity calculated with grain density of 2750 kg/m3.	3.97557e+06	3.94551e+06
NGU-253	58.5903	4.24537	288		0	1	1	1.3815	percent	75	percent	4-8	687.5	kg/m3	9.49781	kg/m3	NGU rapport 97.065 (Porosity, DBD)	DBD measured or calculated from wet bulk density and water content. Porosity calculated with grain density of 2750 kg/m3.	3.98616e+06	3.95676e+06
NGU-254	58.6808	4.38345	270		0	10	10	1.2662	percent	72	percent	4-8	770	kg/m3	9.74974	kg/m3	NGU rapport 97.065 (Porosity, DBD)	DBD measured or calculated from wet bulk density and water content. Porosity calculated with grain density of 2750 kg/m3.	3.995e+06	3.96615e+06
NGU-255	58.7718	4.52267	242		0	1	1	1.232	percent	69	percent	4-8	852.5	kg/m3	10.5028	kg/m3	NGU rapport 97.065 (Porosity, DBD)	DBD measured or calculated from wet bulk density and water content. Porosity calculated with grain density of 2750 kg/m3.	4.00388e+06	3.97562e+06
NGU-256	58.8787	4.68808	250		0	1	1	1.453	percent	73	percent	4-8	742.5	kg/m3	10.7885	kg/m3	NGU rapport 97.065 (Porosity, DBD)	DBD measured or calculated from wet bulk density and water content. Porosity calculated with grain density of 2750 kg/m3.	4.01436e+06	3.98675e+06
NGU-257	58.9823	4.84958	250		0	1	1	1.289	percent	70	percent	4-8	825	kg/m3	10.6342	kg/m3	NGU rapport 97.065 (Porosity, DBD)	DBD measured or calculated from wet bulk density and water content. Porosity calculated with grain density of 2750 kg/m3.	4.02454e+06	3.99755e+06
NGU-258	59.0415	4.71075	279		0	10	10	1.4623	percent	80	percent	4-8	550	kg/m3	8.04265	kg/m3	NGU rapport 97.065 (Porosity, DBD)	DBD measured or calculated from wet bulk density and water content. Porosity calculated with grain density of 2750 kg/m3.	4.01708e+06	4.00471e+06
NGU-259	58.9381	4.54873	257		0	1	1	1.777	percent	79	percent	4-8	577.5	kg/m3	10.2622	kg/m3	NGU rapport 97.065 (Porosity, DBD)	DBD measured or calculated from wet bulk density and water content. Porosity calculated with grain density of 2750 kg/m3.	4.00687e+06	3.99395e+06
NGU-260	58.8312	4.38388	245		0	1	1	1.381	percent	72	percent	4-8	770	kg/m3	10.6337	kg/m3	NGU rapport 97.065 (Porosity, DBD)	DBD measured or calculated from wet bulk density and water content. Porosity calculated with grain density of 2750 kg/m3.	3.99641e+06	3.98283e+06
NGU-261	58.7405	4.2446	280		0	1	1	1.269	percent	71	percent	4-8	797.5	kg/m3	10.1203	kg/m3	NGU rapport 97.065 (Porosity, DBD)	DBD measured or calculated from wet bulk density and water content. Porosity calculated with grain density of 2750 kg/m3.	3.98753e+06	3.97342e+06
NGU-262	58.6487	4.106	286		0	10	10	1.54615	percent	77	percent	4-8	632.5	kg/m3	9.7794	kg/m3	NGU rapport 97.065 (Porosity, DBD)	DBD measured or calculated from wet bulk density and water content. Porosity calculated with grain density of 2750 kg/m3.	3.97863e+06	3.9639e+06
NGU-263	58.5398	3.94167	256		0	1	1	0.8689	percent	57	percent	4-8	1182.5	kg/m3	10.2747	kg/m3	NGU rapport 97.065 (Porosity, DBD)	DBD measured or calculated from wet bulk density and water content. Porosity calculated with grain density of 2750 kg/m3.	3.96804e+06	3.95264e+06
NGU-264	58.4368	3.78718	153		0	8	8	0.308119	percent	41	percent	4-8	1622.5	kg/m3	4.99923	kg/m3	NGU rapport 97.065 (Porosity, DBD)	DBD measured or calculated from wet bulk density and water content. Porosity calculated with grain density of 2750 kg/m3.	3.95802e+06	3.94199e+06
NGU-268	58.5935	3.79655	235		0	10	10	0.59926	percent	53	percent	4-8	1292.5	kg/m3	7.74544	kg/m3	NGU rapport 97.065 (Porosity, DBD)	DBD measured or calculated from wet bulk density and water content. Porosity calculated with grain density of 2750 kg/m3.	3.96015e+06	3.95931e+06
NGU-269	58.7022	3.97662	278		0	1	1	1.676	percent	77	percent	4-8	632.5	kg/m3	10.6007	kg/m3	NGU rapport 97.065 (Porosity, DBD)	DBD measured or calculated from wet bulk density and water content. Porosity calculated with grain density of 2750 kg/m3.	3.97167e+06	3.97046e+06
NGU-270	58.795	4.11698	288		0	10	10	1.51185	percent	77	percent	4-8	632.5	kg/m3	9.56245	kg/m3	NGU rapport 97.065 (Porosity, DBD)	DBD measured or calculated from wet bulk density and water content. Porosity calculated with grain density of 2750 kg/m3.	3.98068e+06	3.98006e+06
NGU-271	58.8858	4.25582	283		0	1	1	1.388	percent	79	percent	4-8	577.5	kg/m3	8.0157	kg/m3	NGU rapport 97.065 (Porosity, DBD)	DBD measured or calculated from wet bulk density and water content. Porosity calculated with grain density of 2750 kg/m3.	3.98954e+06	3.98947e+06
NGU-272	58.9929	4.42035	258		0	10	10	1.4223	percent	75	percent	4-8	687.5	kg/m3	9.77831	kg/m3	NGU rapport 97.065 (Porosity, DBD)	DBD measured or calculated from wet bulk density and water content. Porosity calculated with grain density of 2750 kg/m3.	3.99999e+06	4.00059e+06
NGU-273	59.0469	4.29147	275		0	1	1	1.217	percent	75	percent	4-8	687.5	kg/m3	8.36688	kg/m3	NGU rapport 97.065 (Porosity, DBD)	DBD measured or calculated from wet bulk density and water content. Porosity calculated with grain density of 2750 kg/m3.	3.9931e+06	4.00717e+06
NGU-274	58.9404	4.12653	292		0	10	10	1.5588	percent	74	percent	4-8	715	kg/m3	11.1454	kg/m3	NGU rapport 97.065 (Porosity, DBD)	DBD measured or calculated from wet bulk density and water content. Porosity calculated with grain density of 2750 kg/m3.	3.98262e+06	3.99613e+06
NGU-275	58.8497	3.98827	282		0	1	1	1.627	percent	80	percent	4-8	550	kg/m3	8.9485	kg/m3	NGU rapport 97.065 (Porosity, DBD)	DBD measured or calculated from wet bulk density and water content. Porosity calculated with grain density of 2750 kg/m3.	3.97379e+06	3.98675e+06
NGU-276	58.7563	3.84505	272		0	10	10	2.0996	percent	82	percent	4-8	495	kg/m3	10.393	kg/m3	NGU rapport 97.065 (Porosity, DBD)	DBD measured or calculated from wet bulk density and water content. Porosity calculated with grain density of 2750 kg/m3.	3.9646e+06	3.9771e+06
NGU-277	58.6473	3.68183	207		0	1	1	0.29	percent	39	percent	4-8	1677.5	kg/m3	4.86475	kg/m3	NGU rapport 97.065 (Porosity, DBD)	DBD measured or calculated from wet bulk density and water content. Porosity calculated with grain density of 2750 kg/m3.	3.95405e+06	3.96585e+06
NGU-280	58.8252	3.84943	273		0	1	1	2.114	percent	77	percent	4-8	632.5	kg/m3	13.3711	kg/m3	NGU rapport 97.065 (Porosity, DBD)	DBD measured or calculated from wet bulk density and water content. Porosity calculated with grain density of 2750 kg/m3.	3.96555e+06	3.98471e+06
NGU-281	58.9222	3.85118	277		0	10	10	2.0634	percent	80	percent	4-8	550	kg/m3	11.3487	kg/m3	NGU rapport 97.065 (Porosity, DBD)	DBD measured or calculated from wet bulk density and water content. Porosity calculated with grain density of 2750 kg/m3.	3.96662e+06	3.99545e+06
NGU-282	59.0255	3.85475	277		0	10	10	2.0064	percent	81	percent	4-8	522.5	kg/m3	10.4834	kg/m3	NGU rapport 97.065 (Porosity, DBD)	DBD measured or calculated from wet bulk density and water content. Porosity calculated with grain density of 2750 kg/m3.	3.96787e+06	4.00689e+06
NGU-283	58.9892	5.08323	248		0	10	10	1.6161	percent	82	percent	4-8	495	kg/m3	7.9997	kg/m3	NGU rapport 97.065 (Porosity, DBD)	DBD measured or calculated from wet bulk density and water content. Porosity calculated with grain density of 2750 kg/m3.	4.03802e+06	3.99736e+06
NGU-284	58.9585	5.25685	270		0	10	10	1.6256	percent	81	percent	4-8	522.5	kg/m3	8.49376	kg/m3	NGU rapport 97.065 (Porosity, DBD)	DBD measured or calculated from wet bulk density and water content. Porosity calculated with grain density of 2750 kg/m3.	4.04776e+06	3.99328e+06
NGU-285	59.1033	5.31763	322		0	10	10	1.4866	percent	74	percent	4-8	715	kg/m3	10.6292	kg/m3	NGU rapport 97.065 (Porosity, DBD)	DBD measured or calculated from wet bulk density and water content. Porosity calculated with grain density of 2750 kg/m3.	4.05236e+06	4.00912e+06
NGU-286	59.2328	5.3465	236		0	10	10	2.3803	percent	84	percent	4-8	440	kg/m3	10.4733	kg/m3	NGU rapport 97.065 (Porosity, DBD)	DBD measured or calculated from wet bulk density and water content. Porosity calculated with grain density of 2750 kg/m3.	4.055e+06	4.02337e+06
NGU-166B	57.7827	5.99568	242		0	2	1	2.346	percent	75	percent	4-8	687.5	kg/m3	16.1288	kg/m3	NGU rapport 97.065 (Porosity, DBD)	DBD measured or calculated from wet bulk density and water content. Porosity calculated with grain density of 2750 kg/m3.	4.0826e+06	3.86011e+06
A84-01	57.4	7.7	210	1984-08-01	0	0.5	1	1	percent	68	percent	0-0.5	848	kg/m3	8.48	kg/m3	https://doi.org/10.1594/PANGAEA.736020	DBD calculated from porosity with grain density of 2650 kg/m3.	4.18259e+06	3.81309e+06
A84-02	57.5	7.6	274	1984-08-01	0	0.5	1	2.4	percent	93	percent	0-0.5	185.5	kg/m3	4.452	kg/m3	https://doi.org/10.1594/PANGAEA.736020	DBD calculated from porosity with grain density of 2650 kg/m3.	4.17696e+06	3.8244e+06
A84-03	57.7	7.6	430	1984-08-01	0	0.5	1	2.3	percent	85	percent	0-0.5	397.5	kg/m3	9.1425	kg/m3	https://doi.org/10.1594/PANGAEA.736020	DBD calculated from porosity with grain density of 2650 kg/m3.	4.17773e+06	3.84664e+06
A84-04	57.8	8.4	530	1984-08-01	0	0.5	1	2.1	percent	94	percent	0-0.5	159	kg/m3	3.339	kg/m3	https://doi.org/10.1594/PANGAEA.736020	DBD calculated from porosity with grain density of 2650 kg/m3.	4.22574e+06	3.85642e+06
A84-05	57.7	8.5	387	1984-08-01	0	0.5	1	2.3	percent	81	percent	0-0.5	503.5	kg/m3	11.5805	kg/m3	https://doi.org/10.1594/PANGAEA.736020	DBD calculated from porosity with grain density of 2650 kg/m3.	4.23145e+06	3.84517e+06
A84-06	57.6	8.5	184	1984-08-01	0	0.5	1	1.4	percent	64	percent	0-0.5	954	kg/m3	13.356	kg/m3	https://doi.org/10.1594/PANGAEA.736020	DBD calculated from porosity with grain density of 2650 kg/m3.	4.2312e+06	3.83405e+06
A84-07	57.4	8.7	73	1984-08-01	0	0.5	1	0.2	percent	43	percent	0-0.5	1510.5	kg/m3	3.021	kg/m3	https://doi.org/10.1594/PANGAEA.736020	DBD calculated from porosity with grain density of 2650 kg/m3.	4.24276e+06	3.81157e+06
A84-08	57.7	10.3	79	1984-08-01	0	0.5	1	0.7	percent	63	percent	0-0.5	980.5	kg/m3	6.8635	kg/m3	https://doi.org/10.1594/PANGAEA.736020	DBD calculated from porosity with grain density of 2650 kg/m3.	4.33891e+06	3.84427e+06
A84-09	57.9	9.9	100	1984-08-01	0	0.5	1	0.3	percent	54	percent	0-0.5	1219	kg/m3	3.657	kg/m3	https://doi.org/10.1594/PANGAEA.736020	DBD calculated from porosity with grain density of 2650 kg/m3.	4.31506e+06	3.86648e+06
A84-11	58.2	9.4	677	1984-08-01	0	0.5	1	2.2	percent	88	percent	0-0.5	318	kg/m3	6.996	kg/m3	https://doi.org/10.1594/PANGAEA.736020	DBD calculated from porosity with grain density of 2650 kg/m3.	4.28566e+06	3.89999e+06
A84-12	58.3	9.3	428	1984-08-01	0	0.5	1	2.4	percent	83	percent	0-0.5	450.5	kg/m3	10.812	kg/m3	https://doi.org/10.1594/PANGAEA.736020	DBD calculated from porosity with grain density of 2650 kg/m3.	4.27989e+06	3.91116e+06
A84-13	58.3	9.9	621	1984-08-01	0	0.5	1	2.6	percent	92	percent	0-0.5	212	kg/m3	5.512	kg/m3	https://doi.org/10.1594/PANGAEA.736020	DBD calculated from porosity with grain density of 2650 kg/m3.	4.31513e+06	3.91096e+06
A84-14	58.3	10.4	409	1984-08-01	0	0.5	1	2.9	percent	86	percent	0-0.5	371	kg/m3	10.759	kg/m3	https://doi.org/10.1594/PANGAEA.736020	DBD calculated from porosity with grain density of 2650 kg/m3.	4.34449e+06	3.91102e+06
A84-15	58.3	10.7	329	1984-08-01	0	0.5	1	2.7	percent	97	percent	0-0.5	79.5	kg/m3	2.1465	kg/m3	https://doi.org/10.1594/PANGAEA.736020	DBD calculated from porosity with grain density of 2650 kg/m3.	4.36211e+06	3.91116e+06
A84-17	58.1	10.7	207	1984-08-01	0	0.5	1	2.2	percent	86	percent	0-0.5	371	kg/m3	8.162	kg/m3	https://doi.org/10.1594/PANGAEA.736020	DBD calculated from porosity with grain density of 2650 kg/m3.	4.36234e+06	3.88892e+06
A84-18	57.9	11.1	121	1984-08-01	0	0.5	1	0.7	percent	49	percent	0-0.5	1351.5	kg/m3	9.4605	kg/m3	https://doi.org/10.1594/PANGAEA.736020	DBD calculated from porosity with grain density of 2650 kg/m3.	4.38632e+06	3.86698e+06
A84-19	57.8	11.5	74	1984-08-01	0	0.5	1	1.6	percent	77	percent	0-0.5	609.5	kg/m3	9.752	kg/m3	https://doi.org/10.1594/PANGAEA.736020	DBD calculated from porosity with grain density of 2650 kg/m3.	4.41031e+06	3.85629e+06
A84-21	57.7	9.3	35	1984-08-01	0	0.5	1	0.4	percent	52	percent	0-0.5	1272	kg/m3	5.088	kg/m3	https://doi.org/10.1594/PANGAEA.736020	DBD calculated from porosity with grain density of 2650 kg/m3.	4.27921e+06	3.84444e+06
A84-22	57.8	9.2	117	1984-08-01	0	0.5	1	0.3	percent	53	percent	0-0.5	1245.5	kg/m3	3.7365	kg/m3	https://doi.org/10.1594/PANGAEA.736020	DBD calculated from porosity with grain density of 2650 kg/m3.	4.27337e+06	3.85562e+06
A84-23	57.9	9.1	528	1984-08-01	0	0.5	1	2.6	percent	79	percent	0-0.5	556.5	kg/m3	14.469	kg/m3	https://doi.org/10.1594/PANGAEA.736020	DBD calculated from porosity with grain density of 2650 kg/m3.	4.26756e+06	3.86681e+06
A84-24	58	9	631	1984-08-01	0	0.5	1	2.3	percent	76	percent	0-0.5	636	kg/m3	14.628	kg/m3	https://doi.org/10.1594/PANGAEA.736020	DBD calculated from porosity with grain density of 2650 kg/m3.	4.26178e+06	3.87801e+06
A84-25	58.1	8.9	420	1984-08-01	0	0.5	1	2.2	percent	86	percent	0-0.5	371	kg/m3	8.162	kg/m3	https://doi.org/10.1594/PANGAEA.736020	DBD calculated from porosity with grain density of 2650 kg/m3.	4.25604e+06	3.88922e+06
A84-26	57.7	8	453	1984-08-01	0	0.5	1	2.2	percent	82	percent	0-0.5	477	kg/m3	10.494	kg/m3	https://doi.org/10.1594/PANGAEA.736020	DBD calculated from porosity with grain density of 2650 kg/m3.	4.2016e+06	3.8459e+06
A84-27	57.6	8.1	196	1984-08-01	0	0.5	1	1.4	percent	86	percent	0-0.5	371	kg/m3	5.194	kg/m3	https://doi.org/10.1594/PANGAEA.736020	DBD calculated from porosity with grain density of 2650 kg/m3.	4.20727e+06	3.83462e+06
A84-28	57.4	8.1	138	1984-08-01	0	0.5	1	0.3	percent	45	percent	0-0.5	1457.5	kg/m3	4.3725	kg/m3	https://doi.org/10.1594/PANGAEA.736020	DBD calculated from porosity with grain density of 2650 kg/m3.	4.20665e+06	3.81238e+06
VVA94-1	54.1037	8.171	20.9	1994-05-25	0	10	3	0.88	percent			0-10	939.831	kg/m3	8.27051	kg/m3	de Haas et al. (1997) Mar Geol 144, 131-146.	OC and DBD measurements are averages of measurements from thre depth horizons (0-1cm, 4-5cm and 9-10cm). DBD calculated from dry weight and initial volume of the sample.	4.20135e+06	3.44561e+06
VVA94-2	55.9975	7.66867	27.7	1994-05-26	0	10	3	0.216667	percent			0-10	1278.1	kg/m3	2.76921	kg/m3	de Haas et al. (1997) Mar Geol 144, 131-146.	OC and DBD measurements are averages of measurements from thre depth horizons (0-1cm, 4-5cm and 9-10cm). DBD calculated from dry weight and initial volume of the sample.	4.17546e+06	3.65719e+06
VVA94-4	58.2163	10.2478	293.2	1994-05-28	0	10	3	2.47	percent			0-10	448.168	kg/m3	11.0697	kg/m3	de Haas et al. (1997) Mar Geol 144, 131-146.	OC and DBD measurements are averages of measurements from thre depth horizons (0-1cm, 4-5cm and 9-10cm). DBD calculated from dry weight and initial volume of the sample.	4.33559e+06	3.90168e+06
VVA94-5	54.3332	6.25267	40.5	1994-05-29	0	10	3	0.146667	percent			0-10	1259.63	kg/m3	1.84745	kg/m3	de Haas et al. (1997) Mar Geol 144, 131-146.	OC and DBD measurements are averages of measurements from thre depth horizons (0-1cm, 4-5cm and 9-10cm). DBD calculated from dry weight and initial volume of the sample.	4.0773e+06	3.47595e+06
VVA94-6	53.7138	4.4845	39.5	1994-05-30	0	10	3	0.463333	percent			0-10	1163.6	kg/m3	5.39133	kg/m3	de Haas et al. (1997) Mar Geol 144, 131-146.	OC and DBD measurements are averages of measurements from thre depth horizons (0-1cm, 4-5cm and 9-10cm). DBD calculated from dry weight and initial volume of the sample.	3.9572e+06	3.41457e+06
VVA94-7	52.7145	4.00017	21.5	1994-05-31	0	10	3	0.0233333	percent			0-10	1482	kg/m3	0.3458	kg/m3	de Haas et al. (1997) Mar Geol 144, 131-146.	OC and DBD measurements are averages of measurements from thre depth horizons (0-1cm, 4-5cm and 9-10cm). DBD calculated from dry weight and initial volume of the sample.	3.91605e+06	3.30623e+06
VVA94-8	53.0062	3.91267	26.6	1994-06-01	0	10	3	0.0366667	percent			0-10	1460	kg/m3	0.535333	kg/m3	de Haas et al. (1997) Mar Geol 144, 131-146.	OC and DBD measurements are averages of measurements from thre depth horizons (0-1cm, 4-5cm and 9-10cm). DBD calculated from dry weight and initial volume of the sample.	3.9129e+06	3.33908e+06
VVA94II-1	53.6187	5.99517	22	1994-08-15	0	10	3	0.0233333	percent			0-10	1432.43	kg/m3	0.334234	kg/m3	de Haas et al. (1997) Mar Geol 144, 131-146.	OC and DBD measurements are averages of measurements from thre depth horizons (0-1cm, 4-5cm and 9-10cm). DBD calculated from dry weight and initial volume of the sample.	4.05611e+06	3.39744e+06
VVA94II-10	57.0018	5.91817	56	1994-08-24	0	1	1	0.06	percent			0-10	1544	kg/m3	0.9264	kg/m3	de Haas et al. (1997) Mar Geol 144, 131-146.	OC and DBD measurements are averages of measurements from thre depth horizons (0-1cm, 4-5cm and 9-10cm). DBD calculated from dry weight and initial volume of the sample.	4.07285e+06	3.77364e+06
VVA94II-11	55	3.008	24.4	1994-08-25	0	1	1	0.06	percent			0-10	1524.64	kg/m3	0.914782	kg/m3	de Haas et al. (1997) Mar Geol 144, 131-146.	OC and DBD measurements are averages of measurements from thre depth horizons (0-1cm, 4-5cm and 9-10cm). DBD calculated from dry weight and initial volume of the sample.	3.87419e+06	3.56552e+06
VVA94II-12	54.1208	1.68667	68	1994-08-25	0	1	1	0.4	percent			0-10	1352.35	kg/m3	5.4094	kg/m3	de Haas et al. (1997) Mar Geol 144, 131-146.	OC and DBD measurements are averages of measurements from thre depth horizons (0-1cm, 4-5cm and 9-10cm). DBD calculated from dry weight and initial volume of the sample.	3.7787e+06	3.47721e+06
VVA94II-2	57.0085	8.013	32	1994-08-18	0	10	3	0.0133333	percent			0-10	1413.4	kg/m3	0.188453	kg/m3	de Haas et al. (1997) Mar Geol 144, 131-146.	OC and DBD measurements are averages of measurements from thre depth horizons (0-1cm, 4-5cm and 9-10cm). DBD calculated from dry weight and initial volume of the sample.	4.20016e+06	3.76899e+06
VVA94II-3	57.565	9.59667	31.1	1994-08-18	9	10	1	0.48	percent			9-10	1529.45	kg/m3	7.34136	kg/m3	de Haas et al. (1997) Mar Geol 144, 131-146.	OC and DBD only measured at 9-10cm depth horizon (other samples too coarse)	4.29683e+06	3.82928e+06
VVA94II-4	58.0338	9.63517	298.5	1994-08-18	0	10	3	1.75333	percent			0-10	506.906	kg/m3	8.88775	kg/m3	de Haas et al. (1997) Mar Geol 144, 131-146.	OC and DBD measurements are averages of measurements from thre depth horizons (0-1cm, 4-5cm and 9-10cm). DBD calculated from dry weight and initial volume of the sample.	4.29941e+06	3.88141e+06
VVA94II-5	58.5853	10.4965	179.2	1994-08-20	0	10	3	1.65333	percent			0-10	513.476	kg/m3	8.48947	kg/m3	de Haas et al. (1997) Mar Geol 144, 131-146.	OC and DBD measurements are averages of measurements from thre depth horizons (0-1cm, 4-5cm and 9-10cm). DBD calculated from dry weight and initial volume of the sample.	4.34993e+06	3.94279e+06
VVA94II-6	58.3313	5.0165	306.5	1994-08-22	0	10	3	1.86333	percent			0-10	535.994	kg/m3	9.98735	kg/m3	de Haas et al. (1997) Mar Geol 144, 131-146.	OC and DBD measurements are averages of measurements from thre depth horizons (0-1cm, 4-5cm and 9-10cm). DBD calculated from dry weight and initial volume of the sample.	4.02884e+06	3.92465e+06
VVA94II-7	56.5045	0.002	76.5	1994-08-23	0	1	1	0.15	percent			0-10	1374.92	kg/m3	2.06237	kg/m3	de Haas et al. (1997) Mar Geol 144, 131-146.	OC and DBD measurements are averages of measurements from thre depth horizons (0-1cm, 4-5cm and 9-10cm). DBD calculated from dry weight and initial volume of the sample.	3.70714e+06	3.7541e+06
VVA94II-9	56.9992	4.0005	61.4	1994-08-24	0	1	1	0.09	percent			0-10	1473.9	kg/m3	1.32651	kg/m3	de Haas et al. (1997) Mar Geol 144, 131-146.	OC and DBD measurements are averages of measurements from thre depth horizons (0-1cm, 4-5cm and 9-10cm). DBD calculated from dry weight and initial volume of the sample.	3.95651e+06	3.78155e+06
VVA95-1	52.4463	3.20817	31.5	1995-05-29	0	1	1	0.03	percent			0-10	1371.58	kg/m3	0.411473	kg/m3	de Haas et al. (1997) Mar Geol 144, 131-146.	OC and DBD measurements are averages of measurements from thre depth horizons (0-1cm, 4-5cm and 9-10cm). DBD calculated from dry weight and initial volume of the sample.	3.85997e+06	3.2812e+06
VVA95-10	59.6663	1.00117	120	1995-06-01	0	1	1	0.39	percent			0-10	1401.93	kg/m3	5.46751	kg/m3	de Haas et al. (1997) Mar Geol 144, 131-146.	OC and DBD measurements are averages of measurements from thre depth horizons (0-1cm, 4-5cm and 9-10cm). DBD calculated from dry weight and initial volume of the sample.	3.8142e+06	4.09503e+06
VVA95-11	60.333	3.36633	285.7	1995-06-01	0	10	3	0.336667	percent			0-10	1208.81	kg/m3	4.06967	kg/m3	de Haas et al. (1997) Mar Geol 144, 131-146.	OC and DBD measurements are averages of measurements from thre depth horizons (0-1cm, 4-5cm and 9-10cm). DBD calculated from dry weight and initial volume of the sample.	3.95417e+06	4.15413e+06
VVA95-12	60.4995	0	118	1995-06-02	0	10	2	0.84	percent			0-10	1192	kg/m3	10.0128	kg/m3	de Haas et al. (1997) Mar Geol 144, 131-146.	OC and DBD measurements are averages of measurements from thre depth horizons (0-1cm, 4-5cm and 9-10cm). DBD calculated from dry weight and initial volume of the sample.	3.77198e+06	4.19429e+06
VVA95-13	57.9475	-1.383	91	1995-06-30	0	10	3	0.77	percent			0-10	923.928	kg/m3	7.11425	kg/m3	de Haas et al. (1997) Mar Geol 144, 131-146.	OC and DBD measurements are averages of measurements from thre depth horizons (0-1cm, 4-5cm and 9-10cm). DBD calculated from dry weight and initial volume of the sample.	3.64926e+06	3.92545e+06
VVA95-3	53.4825	0.647833	46.8	1995-05-30	0	1	1	0.3	percent			0-10	1294.51	kg/m3	3.88354	kg/m3	de Haas et al. (1997) Mar Geol 144, 131-146.	OC and DBD measurements are averages of measurements from thre depth horizons (0-1cm, 4-5cm and 9-10cm). DBD calculated from dry weight and initial volume of the sample.	3.70207e+06	3.41496e+06
VVA95-4	54.7525	1.32883	37.1	1995-05-31	0	1	1	0.08	percent			0-10	1421.46	kg/m3	1.13717	kg/m3	de Haas et al. (1997) Mar Geol 144, 131-146.	OC and DBD measurements are averages of measurements from thre depth horizons (0-1cm, 4-5cm and 9-10cm). DBD calculated from dry weight and initial volume of the sample.	3.76406e+06	3.5498e+06
VVA95-5	55.9982	1.33967	84.6	1995-05-31	0	1	1	0.36	percent			0-10	1380.29	kg/m3	4.96906	kg/m3	de Haas et al. (1997) Mar Geol 144, 131-146.	OC and DBD measurements are averages of measurements from thre depth horizons (0-1cm, 4-5cm and 9-10cm). DBD calculated from dry weight and initial volume of the sample.	3.78179e+06	3.68744e+06
VVA95-6	56.6498	0.729	176.5	1995-05-31	0	1	1	0.82	percent			0-10	1113.8	kg/m3	9.13316	kg/m3	de Haas et al. (1997) Mar Geol 144, 131-146.	OC and DBD measurements are averages of measurements from thre depth horizons (0-1cm, 4-5cm and 9-10cm). DBD calculated from dry weight and initial volume of the sample.	3.75363e+06	3.76415e+06
VVA95-7	57.0007	2.002	93	1995-05-31	0	1	1	0.15	percent			0-10	1436.4	kg/m3	2.1546	kg/m3	de Haas et al. (1997) Mar Geol 144, 131-146.	OC and DBD measurements are averages of measurements from thre depth horizons (0-1cm, 4-5cm and 9-10cm). DBD calculated from dry weight and initial volume of the sample.	3.83562e+06	3.79357e+06
VVA95-8	58.0015	2.00017	87	1995-05-31	0	1	1	0.19	percent			0-10	1638.44	kg/m3	3.11303	kg/m3	de Haas et al. (1997) Mar Geol 144, 131-146.	OC and DBD measurements are averages of measurements from thre depth horizons (0-1cm, 4-5cm and 9-10cm). DBD calculated from dry weight and initial volume of the sample.	3.84842e+06	3.90427e+06
VVA95-9	58.9995	1.99883	115	1995-06-01	0	1	1	0.28	percent			0-10	1490.86	kg/m3	4.17441	kg/m3	de Haas et al. (1997) Mar Geol 144, 131-146.	OC and DBD measurements are averages of measurements from thre depth horizons (0-1cm, 4-5cm and 9-10cm). DBD calculated from dry weight and initial volume of the sample.	3.86134e+06	4.01461e+06
SG	53.1661	2.80796	31	2010-06-07	0	5	1	0.04	percent	36.26	percent	0-10	1689.11	kg/m3	0.675644	kg/m3	http://data.cefas.co.uk/#/View/699; http://data.cefas.co.uk/#/View/725; http://data.cefas.co.uk/#/View/694	DBD calculated from porosity with grain density of 2650 kg/m3.	3.84088e+06	3.36357e+06
SGT_A	53.2864	2.92466	30	2010-06-07	0	5	1	0.07	percent	37	percent	0-15	1669.5	kg/m3	1.16865	kg/m3	http://data.cefas.co.uk/#/View/699; http://data.cefas.co.uk/#/View/725; http://data.cefas.co.uk/#/View/695	DBD calculated from porosity with grain density of 2650 kg/m3.	3.84996e+06	3.37613e+06
SGT_B	53.4058	3.04229	30	2010-06-07	0	5	1	0.11	percent	37.95	percent	0-10	1644.33	kg/m3	1.80876	kg/m3	http://data.cefas.co.uk/#/View/699; http://data.cefas.co.uk/#/View/725; http://data.cefas.co.uk/#/View/696	DBD calculated from porosity with grain density of 2650 kg/m3.	3.85905e+06	3.38861e+06
SGT_C	53.5246	3.16072	33	2010-06-07	0	5	2	0.29	percent	45.5053	percent	0-9.5	1444.11	kg/m3	4.18792	kg/m3	http://data.cefas.co.uk/#/View/699; http://data.cefas.co.uk/#/View/725; http://data.cefas.co.uk/#/View/697	DBD calculated from porosity with grain density of 2650 kg/m3.	3.86814e+06	3.40103e+06
SGT_D	53.6438	3.279	40	2010-06-07	0	5	1	0.38	percent	45.95	percent	0-10	1432.33	kg/m3	5.44283	kg/m3	http://data.cefas.co.uk/#/View/699; http://data.cefas.co.uk/#/View/725; http://data.cefas.co.uk/#/View/698	DBD calculated from porosity with grain density of 2650 kg/m3.	3.87719e+06	3.41352e+06
SGT_F	53.8827	3.51417	37	2010-06-08	0	5	1	0.05	percent	35.1	percent	0-10	1719.85	kg/m3	0.859925	kg/m3	http://data.cefas.co.uk/#/View/699; http://data.cefas.co.uk/#/View/725; http://data.cefas.co.uk/#/View/699	DBD calculated from porosity with grain density of 2650 kg/m3.	3.89508e+06	3.4386e+06
SGT_G	54.0018	3.63315	46	2010-06-08	0	5	1	0.13	percent	42	percent	0-10	1537	kg/m3	1.9981	kg/m3	http://data.cefas.co.uk/#/View/699; http://data.cefas.co.uk/#/View/725; http://data.cefas.co.uk/#/View/700	DBD calculated from porosity with grain density of 2650 kg/m3.	3.90405e+06	3.45112e+06
SGT_H	54.1217	3.75078	45	2010-06-08	0	5	1	0.21	percent	43.45	percent	0-10	1498.58	kg/m3	3.14701	kg/m3	http://data.cefas.co.uk/#/View/699; http://data.cefas.co.uk/#/View/725; http://data.cefas.co.uk/#/View/701	DBD calculated from porosity with grain density of 2650 kg/m3.	3.9129e+06	3.46374e+06
SGT_I	54.2401	3.8689	44	2010-06-08	0	5	1	0.17	percent	43.9	percent	0-10	1486.65	kg/m3	2.52731	kg/m3	http://data.cefas.co.uk/#/View/699; http://data.cefas.co.uk/#/View/725; http://data.cefas.co.uk/#/View/702	DBD calculated from porosity with grain density of 2650 kg/m3.	3.92173e+06	3.47621e+06
SGT_J	54.3596	3.98658	45	2010-06-08	0	5	1	0.26	percent	43.7	percent	0-10	1491.95	kg/m3	3.87907	kg/m3	http://data.cefas.co.uk/#/View/699; http://data.cefas.co.uk/#/View/725; http://data.cefas.co.uk/#/View/703	DBD calculated from porosity with grain density of 2650 kg/m3.	3.93049e+06	3.48882e+06
OG	54.413	4.04211	46	2010-06-08	0	5	1	0.3	percent	43.51	percent	0-10	1496.98	kg/m3	4.49095	kg/m3	http://data.cefas.co.uk/#/View/699; http://data.cefas.co.uk/#/View/725; http://data.cefas.co.uk/#/View/704	DBD calculated from porosity with grain density of 2650 kg/m3.	3.93459e+06	3.49445e+06
OGT_A	54.476	3.88652	44	2010-06-08	0	5	1	0.17	percent	44.95	percent	0-2	1458.83	kg/m3	2.48	kg/m3	http://data.cefas.co.uk/#/View/699; http://data.cefas.co.uk/#/View/725; http://data.cefas.co.uk/#/View/705	DBD calculated from porosity with grain density of 2650 kg/m3.	3.92513e+06	3.50228e+06
OGT_B	54.5391	3.73093	44	2010-06-09	0	5	1	0.14	percent	41.85	percent	0-10	1540.97	kg/m3	2.15736	kg/m3	http://data.cefas.co.uk/#/View/699; http://data.cefas.co.uk/#/View/725; http://data.cefas.co.uk/#/View/706	DBD calculated from porosity with grain density of 2650 kg/m3.	3.9157e+06	3.51015e+06
OGT_C	54.6014	3.5757	43	2010-06-09	0	5	2	0.17	percent	42.35	percent	0-12	1527.72	kg/m3	2.59713	kg/m3	http://data.cefas.co.uk/#/View/699; http://data.cefas.co.uk/#/View/725; http://data.cefas.co.uk/#/View/707	DBD calculated from porosity with grain density of 2650 kg/m3.	3.90633e+06	3.51794e+06
OGT_D	54.6642	3.42133	42	2010-06-09	0	5	1	0.17	percent	44.85	percent	0-10	1461.47	kg/m3	2.48451	kg/m3	http://data.cefas.co.uk/#/View/699; http://data.cefas.co.uk/#/View/725; http://data.cefas.co.uk/#/View/708	DBD calculated from porosity with grain density of 2650 kg/m3.	3.89704e+06	3.5258e+06
OGT_E	54.7267	3.26628	40	2010-06-09	0	5	1	0.21	percent	44.8231	percent	0-13	1462.19	kg/m3	3.0706	kg/m3	http://data.cefas.co.uk/#/View/699; http://data.cefas.co.uk/#/View/725; http://data.cefas.co.uk/#/View/709	DBD calculated from porosity with grain density of 2650 kg/m3.	3.88774e+06	3.53365e+06
OGT_F	54.7891	3.1106	34	2010-06-09	0	5	1	0.13	percent	40.1429	percent	0-7	1586.21	kg/m3	2.06208	kg/m3	http://data.cefas.co.uk/#/View/699; http://data.cefas.co.uk/#/View/725; http://data.cefas.co.uk/#/View/710	DBD calculated from porosity with grain density of 2650 kg/m3.	3.87844e+06	3.5415e+06
OGT_G	54.8519	2.95567	22	2010-06-09	0	5	1	0.03	percent	34.2	percent	0-7	1743.7	kg/m3	0.52311	kg/m3	http://data.cefas.co.uk/#/View/699; http://data.cefas.co.uk/#/View/725; http://data.cefas.co.uk/#/View/711	DBD calculated from porosity with grain density of 2650 kg/m3.	3.86922e+06	3.54943e+06
DB	54.9508	2.70737	22	2010-06-09	0	5	1	0.11	percent	34.88	percent	0-10	1725.68	kg/m3	1.89825	kg/m3	http://data.cefas.co.uk/#/View/699; http://data.cefas.co.uk/#/View/725; http://data.cefas.co.uk/#/View/712	DBD calculated from porosity with grain density of 2650 kg/m3.	3.85449e+06	3.56197e+06
NDT_K	55.1706	2.56731	33	2010-06-10	0	5	1	0.03	percent	36.3	percent	0-8	1688.05	kg/m3	0.506415	kg/m3	http://data.cefas.co.uk/#/View/699; http://data.cefas.co.uk/#/View/725; http://data.cefas.co.uk/#/View/713	DBD calculated from porosity with grain density of 2650 kg/m3.	3.84814e+06	3.58723e+06
NDT_J	55.2819	2.49687	35	2010-06-10	0	5	1	0.05	percent	36	percent	0-10	1696	kg/m3	0.848	kg/m3	http://data.cefas.co.uk/#/View/699; http://data.cefas.co.uk/#/View/725; http://data.cefas.co.uk/#/View/714	DBD calculated from porosity with grain density of 2650 kg/m3.	3.84499e+06	3.60002e+06
NDT_I	55.4176	2.41637	40	2010-06-10	0	5	1	0.07	percent	34.6	percent	0-10	1733.1	kg/m3	1.21317	kg/m3	http://data.cefas.co.uk/#/View/699; http://data.cefas.co.uk/#/View/725; http://data.cefas.co.uk/#/View/715	DBD calculated from porosity with grain density of 2650 kg/m3.	3.84153e+06	3.61558e+06
DW3	55.1667	1.62955	40	2010-06-10	0	5	1	0.05	percent	35.765	percent	0-10	1702.23	kg/m3	0.851114	kg/m3	http://data.cefas.co.uk/#/View/699; http://data.cefas.co.uk/#/View/725; http://data.cefas.co.uk/#/View/716	DBD calculated from porosity with grain density of 2650 kg/m3.	3.78872e+06	3.59334e+06
NDT_H	55.5001	2.36834	51	2010-06-11	0	5	1	0.08	percent	36.1455	percent	0-11	1692.15	kg/m3	1.35372	kg/m3	http://data.cefas.co.uk/#/View/699; http://data.cefas.co.uk/#/View/725; http://data.cefas.co.uk/#/View/717	DBD calculated from porosity with grain density of 2650 kg/m3.	3.83951e+06	3.62504e+06
ND	55.6833	2.27922	81	2010-06-11	0	5	2	0.375	percent	51.435	percent	0-10	1286.97	kg/m3	4.82615	kg/m3	http://data.cefas.co.uk/#/View/699; http://data.cefas.co.uk/#/View/725; http://data.cefas.co.uk/#/View/718	DBD calculated from porosity with grain density of 2650 kg/m3.	3.83615e+06	3.64591e+06
NDT_B	56.0001	2.0647	84	2010-06-12	0	5	1	0.4	percent	48	percent	0-8	1378	kg/m3	5.512	kg/m3	http://data.cefas.co.uk/#/View/699; http://data.cefas.co.uk/#/View/725; http://data.cefas.co.uk/#/View/719	DBD calculated from porosity with grain density of 2650 kg/m3.	3.82673e+06	3.68244e+06
NDT_C	56.2008	1.94199	83	2010-06-13	0	5	1	0.34	percent	45.2	percent	0-8	1452.2	kg/m3	4.93748	kg/m3	http://data.cefas.co.uk/#/View/699; http://data.cefas.co.uk/#/View/725; http://data.cefas.co.uk/#/View/720	DBD calculated from porosity with grain density of 2650 kg/m3.	3.8217e+06	3.7055e+06
DT	56.2666	1.63398	100	2010-06-13	0	5	1	0.7	percent	57.52	percent	0-10	1125.72	kg/m3	7.88004	kg/m3	http://data.cefas.co.uk/#/View/699; http://data.cefas.co.uk/#/View/725; http://data.cefas.co.uk/#/View/721	DBD calculated from porosity with grain density of 2650 kg/m3.	3.80359e+06	3.71496e+06
LR	55.4995	1.0001	74	2010-06-13	0	5	1	0.21	percent	40.315	percent	0-10	1581.65	kg/m3	3.32147	kg/m3	http://data.cefas.co.uk/#/View/699; http://data.cefas.co.uk/#/View/725; http://data.cefas.co.uk/#/View/722	DBD calculated from porosity with grain density of 2650 kg/m3.	3.75366e+06	3.63493e+06
LRT_A	55.2497	0.49996	85	2010-06-14	0	5	1	0.56	percent	51.4091	percent	0-11	1287.66	kg/m3	7.21089	kg/m3	http://data.cefas.co.uk/#/View/699; http://data.cefas.co.uk/#/View/725; http://data.cefas.co.uk/#/View/723	DBD calculated from porosity with grain density of 2650 kg/m3.	3.71859e+06	3.61141e+06
HP	54.7501	-0.50027	60	2010-06-14	0	5	1	0.22	percent	39.585	percent	0-10	1601	kg/m3	3.52219	kg/m3	http://data.cefas.co.uk/#/View/699; http://data.cefas.co.uk/#/View/725; http://data.cefas.co.uk/#/View/724	DBD calculated from porosity with grain density of 2650 kg/m3.	3.64742e+06	3.56514e+06
S01	52.2999	2.55152	48	2011-06-24	0	5	1	0.03	percent	36.7167	percent	0-10	1677.01	kg/m3	0.503102	kg/m3	http://data.cefas.co.uk/#/View/699; http://data.cefas.co.uk/#/View/725; http://data.cefas.co.uk/#/View/725	DBD calculated from porosity with grain density of 2650 kg/m3.	3.8139e+06	3.26934e+06
S02	52.4584	2.70763	48	2011-06-24	0	5	1	0.03	percent	35.4667	percent	0-10	1710.13	kg/m3	0.51304	kg/m3	http://data.cefas.co.uk/#/View/699; http://data.cefas.co.uk/#/View/725; http://data.cefas.co.uk/#/View/726	DBD calculated from porosity with grain density of 2650 kg/m3.	3.82626e+06	3.28583e+06
S03	53.1065	2.23891	30	2011-06-25	0	5	1	0.03	percent	36.8833	percent	0-10	1672.59	kg/m3	0.501778	kg/m3	http://data.cefas.co.uk/#/View/699; http://data.cefas.co.uk/#/View/725; http://data.cefas.co.uk/#/View/727	DBD calculated from porosity with grain density of 2650 kg/m3.	3.80234e+06	3.36088e+06
S04	53.2681	1.71716	35	2011-06-25	0	5	1	0.05	percent	36.6167	percent	0-10	1679.66	kg/m3	0.839829	kg/m3	http://data.cefas.co.uk/#/View/699; http://data.cefas.co.uk/#/View/725; http://data.cefas.co.uk/#/View/728	DBD calculated from porosity with grain density of 2650 kg/m3.	3.76971e+06	3.38262e+06
S06	53.5123	1.5027	33	2011-06-25	0	5	1	0.13	percent	36.85	percent	0-10	1673.47	kg/m3	2.17552	kg/m3	http://data.cefas.co.uk/#/View/699; http://data.cefas.co.uk/#/View/725; http://data.cefas.co.uk/#/View/729	DBD calculated from porosity with grain density of 2650 kg/m3.	3.75872e+06	3.41129e+06
S07	53.6067	1.19215	25	2011-06-25	0	5	1	0.29	percent	30.4	percent	0-10	1844.4	kg/m3	5.34876	kg/m3	http://data.cefas.co.uk/#/View/699; http://data.cefas.co.uk/#/View/725; http://data.cefas.co.uk/#/View/730	DBD calculated from porosity with grain density of 2650 kg/m3.	3.73958e+06	3.42418e+06
C01	54.0033	0.809613	53	2011-06-26	0	5	1	0.17	percent	42	percent	0-10	1537	kg/m3	2.6129	kg/m3	http://data.cefas.co.uk/#/View/699; http://data.cefas.co.uk/#/View/725; http://data.cefas.co.uk/#/View/731	DBD calculated from porosity with grain density of 2650 kg/m3.	3.72014e+06	3.47114e+06
S09	54.333	1.03757	38	2011-06-26	0	5	1	0.04	percent	38.2167	percent	0-10	1637.26	kg/m3	0.654903	kg/m3	http://data.cefas.co.uk/#/View/699; http://data.cefas.co.uk/#/View/725; http://data.cefas.co.uk/#/View/732	DBD calculated from porosity with grain density of 2650 kg/m3.	3.73957e+06	3.50572e+06
C03	54.5707	0.684161	67	2011-06-26	0	5	1	0.16	percent	40.7833	percent	0-10	1569.24	kg/m3	2.51079	kg/m3	http://data.cefas.co.uk/#/View/699; http://data.cefas.co.uk/#/View/725; http://data.cefas.co.uk/#/View/733	DBD calculated from porosity with grain density of 2650 kg/m3.	3.72025e+06	3.53487e+06
C08	54.5146	1.26319	57	2011-06-27	0	5	1	0.27	percent	42.4333	percent	0-10	1525.52	kg/m3	4.1189	kg/m3	http://data.cefas.co.uk/#/View/699; http://data.cefas.co.uk/#/View/725; http://data.cefas.co.uk/#/View/734	DBD calculated from porosity with grain density of 2650 kg/m3.	3.7566e+06	3.52401e+06
C07	54.8216	1.61586	27	2011-06-27	0	5	1	0.07	percent	38.35	percent	0-10	1633.72	kg/m3	1.14361	kg/m3	http://data.cefas.co.uk/#/View/699; http://data.cefas.co.uk/#/View/725; http://data.cefas.co.uk/#/View/735	DBD calculated from porosity with grain density of 2650 kg/m3.	3.7833e+06	3.55526e+06
N02	55.4698	1.25051	83	2011-06-27	0	5	2	0.275	percent	43.3167	percent	0-10	1502.11	kg/m3	4.1308	kg/m3	http://data.cefas.co.uk/#/View/699; http://data.cefas.co.uk/#/View/725; http://data.cefas.co.uk/#/View/736	DBD calculated from porosity with grain density of 2650 kg/m3.	3.76894e+06	3.62971e+06
C05	55.3441	1.60022	61	2011-07-27	0	5	1	0.07	percent	36.8	percent	0-10	1674.8	kg/m3	1.17236	kg/m3	http://data.cefas.co.uk/#/View/699; http://data.cefas.co.uk/#/View/725; http://data.cefas.co.uk/#/View/737	DBD calculated from porosity with grain density of 2650 kg/m3.	3.78922e+06	3.61318e+06
C06	54.9332	2.18898	28	2011-06-27	0	5	1	0.05	percent	37.2	percent	0-10	1664.2	kg/m3	0.8321	kg/m3	http://data.cefas.co.uk/#/View/699; http://data.cefas.co.uk/#/View/725; http://data.cefas.co.uk/#/View/738	DBD calculated from porosity with grain density of 2650 kg/m3.	3.82126e+06	3.56349e+06
S12	54.5301	2.43098	22	2011-06-28	0	5	1	0.04	percent	36.6333	percent	0-10	1679.22	kg/m3	0.671687	kg/m3	http://data.cefas.co.uk/#/View/699; http://data.cefas.co.uk/#/View/725; http://data.cefas.co.uk/#/View/739	DBD calculated from porosity with grain density of 2650 kg/m3.	3.83188e+06	3.5172e+06
S13	54.454	2.50304	21	2011-06-28	0	5	1	0.04	percent	36.1667	percent	0-10	1691.58	kg/m3	0.676633	kg/m3	http://data.cefas.co.uk/#/View/699; http://data.cefas.co.uk/#/View/725; http://data.cefas.co.uk/#/View/740	DBD calculated from porosity with grain density of 2650 kg/m3.	3.83562e+06	3.50829e+06
S11	54.4136	2.17111	33	2011-06-28	0	5	1	0.46	percent	30.25	percent	0-10	1848.38	kg/m3	8.50253	kg/m3	http://data.cefas.co.uk/#/View/699; http://data.cefas.co.uk/#/View/725; http://data.cefas.co.uk/#/View/741	DBD calculated from porosity with grain density of 2650 kg/m3.	3.81373e+06	3.50609e+06
M01	54.0388	2.19713	76	2011-06-28	0	5	1	0.24	percent	46.5333	percent	0-10	1416.87	kg/m3	3.40048	kg/m3	http://data.cefas.co.uk/#/View/699; http://data.cefas.co.uk/#/View/725; http://data.cefas.co.uk/#/View/742	DBD calculated from porosity with grain density of 2650 kg/m3.	3.81084e+06	3.46441e+06
M02	54.0441	2.62988	61	2011-06-28	0	5	1	0.24	percent	45.0167	percent	0-10	1457.06	kg/m3	3.49694	kg/m3	http://data.cefas.co.uk/#/View/699; http://data.cefas.co.uk/#/View/725; http://data.cefas.co.uk/#/View/743	DBD calculated from porosity with grain density of 2650 kg/m3.	3.83908e+06	3.46203e+06
C11	55.1152	2.8588	28	2011-06-29	0	5	1	0.04	percent	36.9	percent	0-10	1672.15	kg/m3	0.66886	kg/m3	http://data.cefas.co.uk/#/View/699; http://data.cefas.co.uk/#/View/725; http://data.cefas.co.uk/#/View/744	DBD calculated from porosity with grain density of 2650 kg/m3.	3.86599e+06	3.57921e+06
C12	55.2543	3.17204	31	2011-06-29	0	5	1	0.05	percent	36.65	percent	0-10	1678.78	kg/m3	0.839387	kg/m3	http://data.cefas.co.uk/#/View/699; http://data.cefas.co.uk/#/View/725; http://data.cefas.co.uk/#/View/745	DBD calculated from porosity with grain density of 2650 kg/m3.	3.88737e+06	3.5927e+06
N04	56.041	2.1173	85	2011-06-29	0	5	1	0.33	percent	50.0167	percent	0-10	1324.56	kg/m3	4.37104	kg/m3	http://data.cefas.co.uk/#/View/699; http://data.cefas.co.uk/#/View/725; http://data.cefas.co.uk/#/View/746	DBD calculated from porosity with grain density of 2650 kg/m3.	3.8305e+06	3.68661e+06
N05	56.456	1.50716	102	2011-06-30	0	5	1	0.65	percent	54.9833	percent	0-10	1192.94	kg/m3	7.75412	kg/m3	http://data.cefas.co.uk/#/View/699; http://data.cefas.co.uk/#/View/725; http://data.cefas.co.uk/#/View/747	DBD calculated from porosity with grain density of 2650 kg/m3.	3.79835e+06	3.73681e+06
C17	56.1715	-0.97368	74	2011-06-30	0	5	2	0.215	percent	41.9	percent	0-10	1539.65	kg/m3	3.31025	kg/m3	http://data.cefas.co.uk/#/View/699; http://data.cefas.co.uk/#/View/725; http://data.cefas.co.uk/#/View/748	DBD calculated from porosity with grain density of 2650 kg/m3.	3.64194e+06	3.7262e+06
C19	55.7916	-1.57671	66	2011-06-30	0	5	1	0.3	percent	49	percent	0-10	1351.5	kg/m3	4.0545	kg/m3	http://data.cefas.co.uk/#/View/699; http://data.cefas.co.uk/#/View/725; http://data.cefas.co.uk/#/View/749	DBD calculated from porosity with grain density of 2650 kg/m3.	3.59802e+06	3.69028e+06
N07	55.7133	-1.04555	85	2011-07-01	0	5	2	0.235	percent	40.95	percent	0-10	1564.83	kg/m3	3.67734	kg/m3	http://data.cefas.co.uk/#/View/699; http://data.cefas.co.uk/#/View/725; http://data.cefas.co.uk/#/View/750	DBD calculated from porosity with grain density of 2650 kg/m3.	3.62951e+06	3.67643e+06
N08	55.5976	-0.95391	92	2011-07-01	0	5	1	0.39	percent	48.9667	percent	0-10	1352.38	kg/m3	5.27429	kg/m3	http://data.cefas.co.uk/#/View/699; http://data.cefas.co.uk/#/View/725; http://data.cefas.co.uk/#/View/751	DBD calculated from porosity with grain density of 2650 kg/m3.	3.63319e+06	3.66281e+06
M05	55.2772	-1.13788	91	2011-07-01	0	5	1	1	percent	66.2833	percent	0-10	893.492	kg/m3	8.93492	kg/m3	http://data.cefas.co.uk/#/View/699; http://data.cefas.co.uk/#/View/725; http://data.cefas.co.uk/#/View/752	DBD calculated from porosity with grain density of 2650 kg/m3.	3.61611e+06	3.62932e+06
M06	55.2645	-1.30361	63	2011-07-01	0	5	1	0.36	percent	43.7167	percent	0-10	1491.51	kg/m3	5.36943	kg/m3	http://data.cefas.co.uk/#/View/699; http://data.cefas.co.uk/#/View/725; http://data.cefas.co.uk/#/View/753	DBD calculated from porosity with grain density of 2650 kg/m3.	3.60549e+06	3.62955e+06
